# Supplementary material
Source: PubMed Central journal article supplement (PMC3707548)
Supplement: supp_pp.113.217851_217851Supplemental_Material_Final.pdf [file supp_pp.113.217851_217851Supplemental_Material_Final.pdf]

Supplemental Figure 1: Fully annotated heat map of genetic (top) and phenotypic correlations (bottom) between each of the measured metabolites of the doubled haploid wheat population. The colour assigned to a point in the heat map grid indicates the strength of a particular correlation between two traits. The level of correlation is indicated by red for positive correlations and blue for negative correlations, as depicted in the colour key. Image made with R (<http://www.r-project.org/>). This is the fully annotated version of Figure 1, which can be found in the manuscript.



Supplemental Figure 2: Full annotated clustered heat map of the genetic correlations between the agronomic traits and the measured metabolites of the doubled haploid wheat population. Clustering of the agronomic traits is depicted by the dendrogram at top, broken into six groups, labelled A through F. Clustering of the metabolic traits is depicted by the dendrogram at left, broken into five groups, labelled 1 through 5. The colour assigned to a point in the heat map grid indicates the strength of a particular correlation between two traits. The level of correlation is indicated by red for positive correlation, blue for negative correlation, white for no correlation, as depicted in the colour key at top left. Image made with R (<http://www.r-project.org/>). This is the fully annotated version of Figure 3, which can be found in the manuscript.

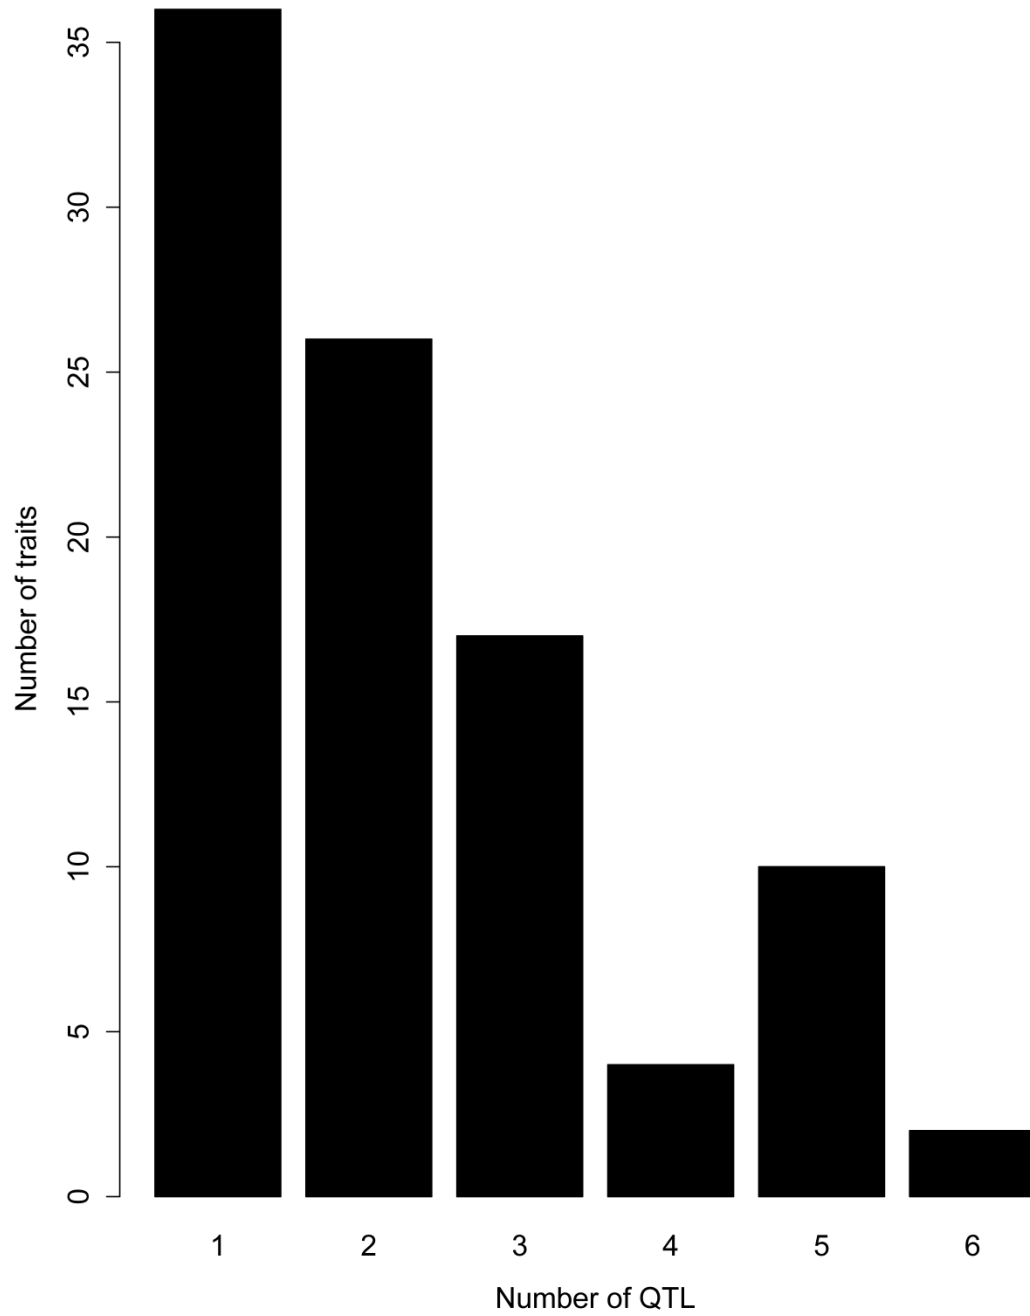

Supplemental Figure 3: Frequency distribution of the number of mQTL detected for each metabolic trait. Data is based on two biological and two technical replicates per DH line.

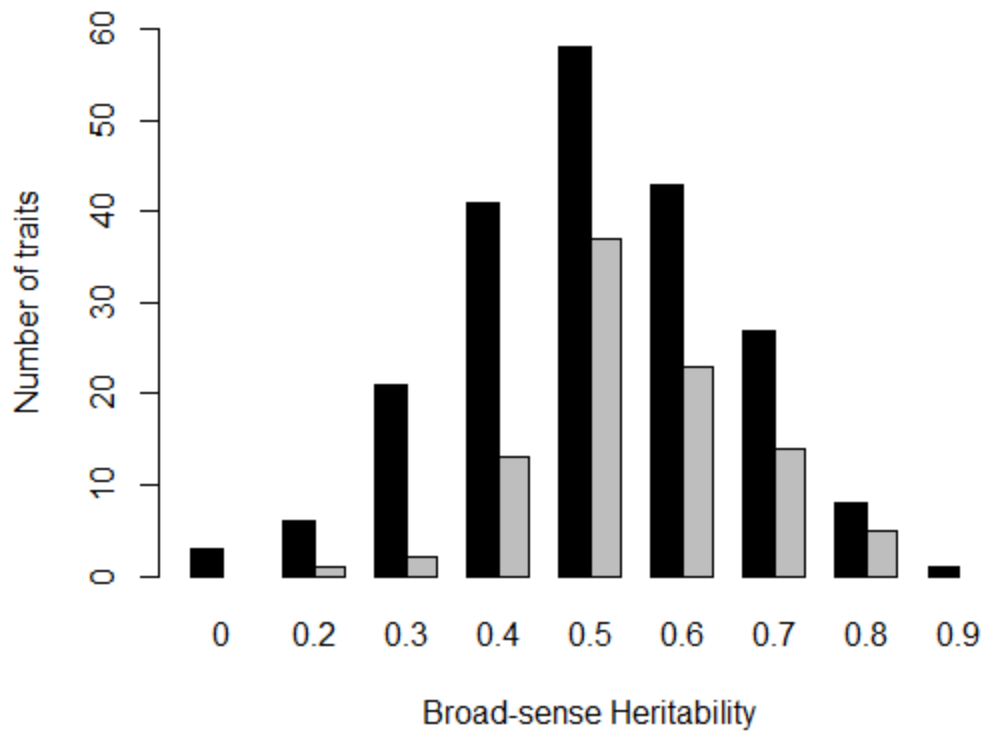

Supplemental Figure 4: Frequency distribution of broad-sense heritability of each detected metabolic trait in the DH population. Black and grey bars represent all measured metabolites, and metabolites for which at least one QTL was detected, respectively. Data is based on two biological and two technical replicates per DH line.

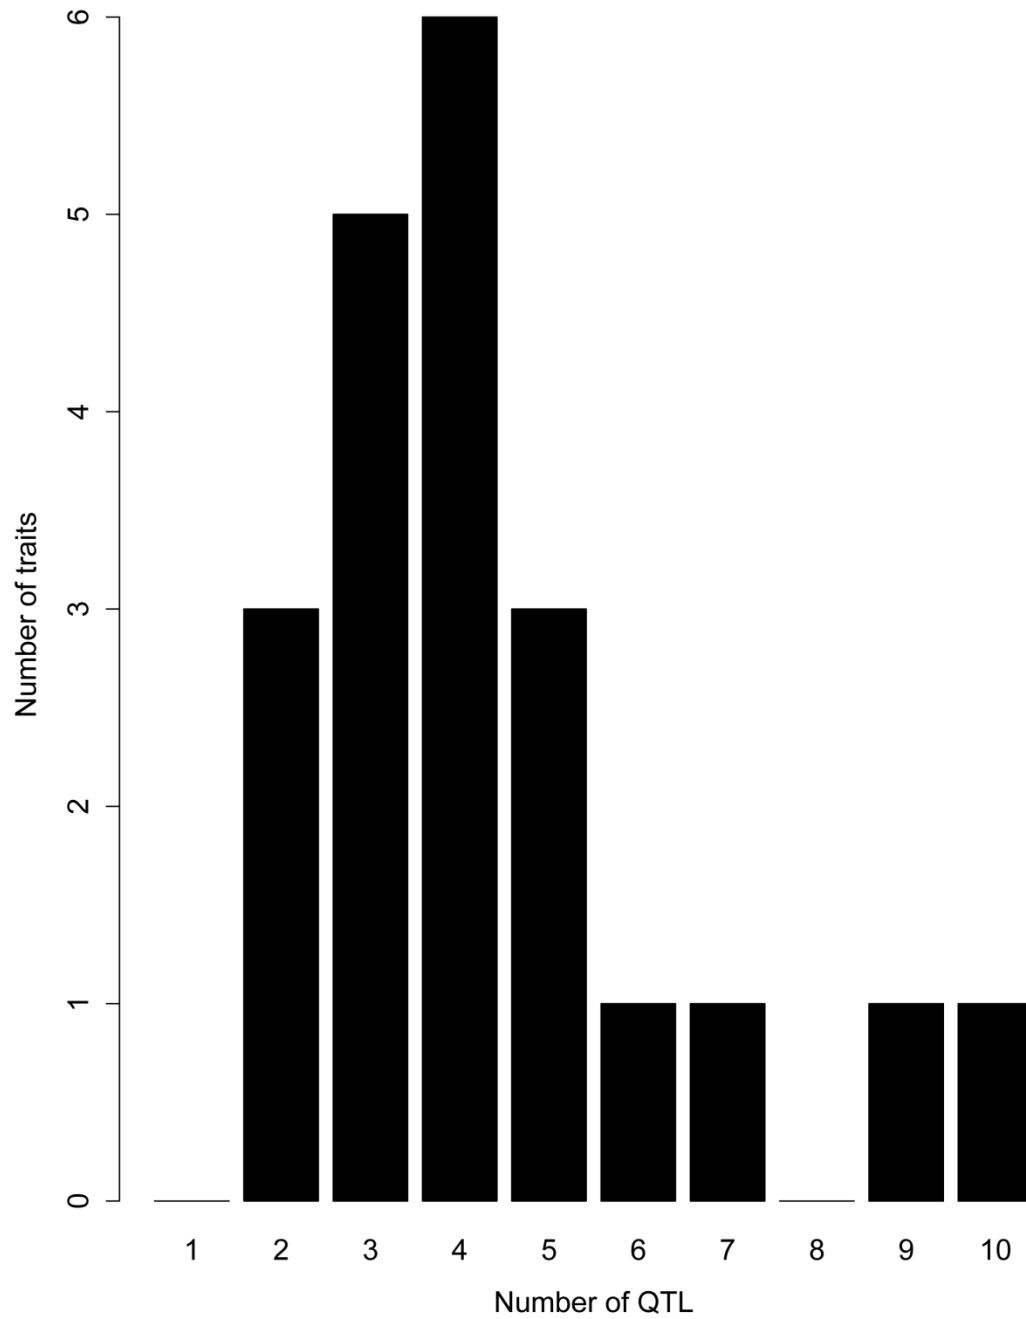

Supplemental Figure 5: Frequency distribution of the number of QTL detected for each yield or yield-related phenotypic trait. Data is based on two biological and two technical replicates per DH line.

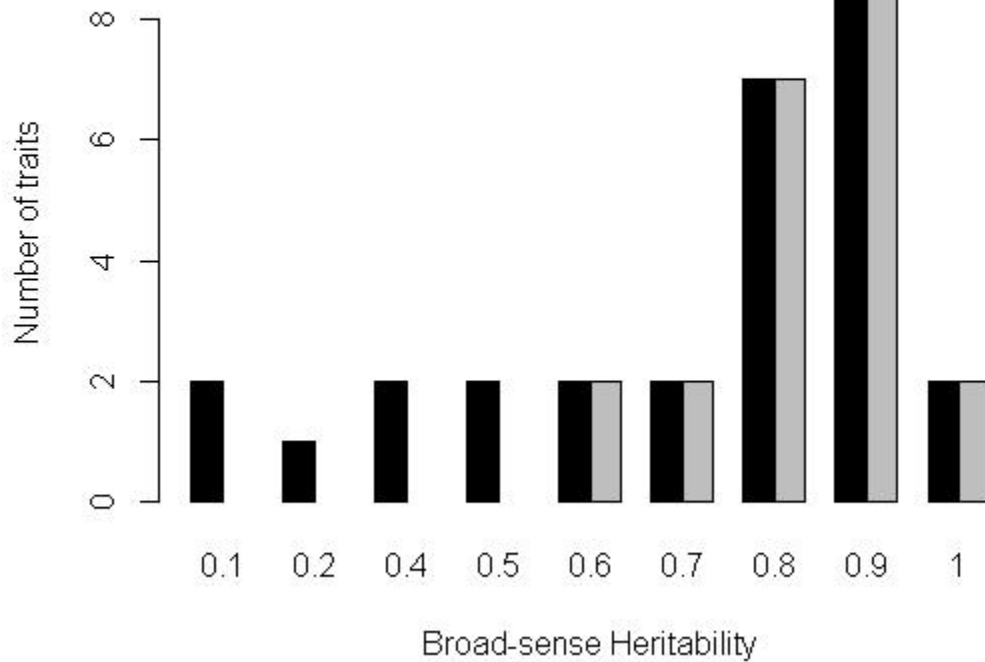

Supplemental Figure 6: Frequency distribution of broad-sense heritability of each detected trait in the DH population. Black and grey bars represent all traits, and traits for which at least one QTL was detected, respectively. Data is based on two biological replicates per DH line.



Supplemental Table 1: List of metabolite traits measured for 179 lines of the Excalibur/Kukri doubled haploid population

| TRAIT GROUP AND NAME | ABBREVIATION | TMS | MEOX | LIBRARY IDENTIFIER                                              | QUANT ION | RT    | RI   | CONFIDENCE (%) |
|----------------------|--------------|-----|------|-----------------------------------------------------------------|-----------|-------|------|----------------|
| <b>Amino Acid</b>    |              |     |      |                                                                 |           |       |      |                |
| Alanine              | Ala          | 2   | -    | EIQTMS_110001-101_METB_1095.5_Alanine, DL-(2TMS)                | 116       | 7.65  | 1096 | 87.21          |
| Valine               | Val          | 2   | -    | EIQTMS_122001-101_METB_1220.2_Valine, DL-(2TMS)                 | 144       | 9.68  | 1208 | 50             |
| Isoleucine           | Ile          | 2   | -    | EIQTMS_132002-101_METB_1300.6_Isoleucine, DL-(2TMS)             | 158       | 11.13 | 1288 | 88.63          |
| Proline              | Pro          | 2   | -    | EIQTMS_132003-101_METB_1303.4_Proline, DL-(2TMS)                | 142       | 11.26 | 1295 | 87.61          |
| Serine               | Ser          | 3   | -    | EIROE_138001-101_METB_1369.3_Serine, DL-(3TMS)                  | 204       | 12.34 | 1354 | 88.8           |
| Threonine            | Thr          | 3   | -    | EIQTMS_140001-101_METB_1394_Threonine, DL-(3TMS)                | 218       | 12.79 | 1379 | 87.4           |
| beta-Alanine         | b_Ala        | 3   | -    | EIQTMS_144001-101_METB_1431.4_Alanine, beta-(3TMS)              | 116       | 12.94 | 1423 | 87             |
| Aspartate            | Asp          | 2   | -    | EIQTMS_152002-101_METB_1525_Aspartic acid, DL-(3TMS)            | 160       | 13.58 | 1503 | 85.8           |
| Homoserine           | Hse          | 3   | -    | EISTR_146001-101_METB_1454_Homoserine, DL-(3TMS)                | 218       | 13.95 | 1443 | 83.43          |
| 5-Oxoproline         | 5OP          | 2   | -    | EIQTMS_153002-101_METB/METB_1528.1_Pyroglytamic acid, DL-(2TMS) | 156       | 15.33 | 1518 | 85.22          |
| GABA                 | GABA         | 3   | -    | EIQTMS_153003-101_METB_1530.7_Butyric acid, 4-amino-(3TMS)      | 174       | 15.40 | 1521 | 84.84          |
| Ornithine            | Orn          | 3   | -    | EISTR_162001-101_MST/MST_1624.2_Ornithine, DL-(3TMS)            | 142       | 16.80 | 1594 | 77.44          |
| Glutamate            | Glu          | 3   | -    | EISTR_163001-101_METB_1631.4_Glutamic acid, DL-(3TMS)           | 246       | 16.90 | 1599 | 84.7           |
| Phenylalanine        | Phe          | 2   | -    | EIQTMS_164001-101_METB_1635.4_Phenylalanine, DL-(2TMS)          | 218       | 17.05 | 1607 | 82.87          |
| Glutamine            | Gln          | 3   | -    | EISTR_178001-101_METB_1785.1_Glutamine, DL-(3TMS)               | 227       | 17.63 | 1638 | 95             |
| Asparagine           | Asn          | 3   | -    | EIQTMS_168001-101_METB_1683.3_Asparagine, DL-(3TMS)             | 116       | 17.72 | 1642 | 68.32          |

|                         |      |   |   |                                                                 |     |       |      |       |
|-------------------------|------|---|---|-----------------------------------------------------------------|-----|-------|------|-------|
| BABA                    | BABA | 2 | - | EINIST_121001-101_METB_1210.6_Butyric acid, 3-amino-, DL-(2TMS) | 189 | 19.60 | 1739 | 61    |
| Arginine                | Arg  | 3 | - | EIQTMS_183001-101_METB_1832.8_Arginine, DL-, -NH3 (3TMS)        | 157 | 20.10 | 1769 | 95    |
| Lysine                  | Lys  | 4 | - | EIROE_192003-101_METB_1920.8_Lysine, DL-(4TMS)                  | 174 | 21.49 | 1837 | 61.11 |
| Tyrosine                | Tyr  | 3 | - | EISTR_194002-101_METB_1941.4_Tyrosine, DL-(3TMS)                | 218 | 21.76 | 1851 | 78.56 |
| Tryptophan              | Trp  | 3 | - | EINIST_223001-101_METB_2218.6_Tryptophan, L-(3TMS)              | 202 | 25.46 | 2210 | 78.69 |
| Glycine                 | Gly  | 2 | - | EISTR_114001-101_METB_1118_Glycine (2TMS)                       | 204 | 34.10 | 3022 | 64.77 |
| Leucine                 | Leu  | 2 | - | EIQTMS_129002-101_METB_1278.8_Leucine, DL-(2TMS)                | 158 | 10.67 | 1333 | 70.58 |
| Methionine              | Met  | 2 | - | EITTMS_152001-101_METB_1521.2_Methionine, DL-(2TMS)             | 176 | 15.25 | 1513 | 54.43 |
| <b>Amine</b>            |      |   |   |                                                                 |     |       |      |       |
| Ethanolamine            | Etn  | 3 | - | EITTMS_128002-101_METB_1269.1_Ethanolamine (3TMS)               | 174 | 10.62 | 1260 | 82.44 |
| 3-amino-Piperidin-2-one | AP   | 2 | - | EISTR_147003-101_MST_1460_Piperidin-2-one, 3-amino- (2TMS)      | 128 | 14.16 | 1450 | 95    |
| <b>Sugar</b>            |      |   |   |                                                                 |     |       |      |       |
| Xylose                  | Xyl  | 4 | 1 | EIQTMS_166001-101_METB_1669.2_Xylose, D-(1MEOX) (4TMS)          | 217 | 17.38 | 1624 | 77.55 |
| Arabinose               | Ara  | 4 | 1 | EIQTMS_166001-101_METB_1669.2_Xylose, D-(1MEOX) (4TMS)          | 307 | 17.50 | 1630 | 81.69 |
| Fructose                | Fruc | 5 | 1 | EIQTMS_187002-101_METB_1874.6_Fructose, D (1MEOX) (5TMS)        | 307 | 20.70 | 1796 | 86.93 |
| Mannose                 | Man  | 5 | 1 | EISTR_188002-101_METB_1888.1_Mannose, D-(1MEOX)                 | 319 | 20.90 | 1807 | 87.78 |
| Galactose               | Gal  | 5 | 1 | EIQTMS_188001-101_METB_1892.3_Galactose, D-(1MEOX) (5TMS)       | 319 | 20.96 | 1810 | 96    |
| Glucose                 | Glc  | 5 | 1 | EIROE_189002-101_METB_1897.3_Glucose, D-(1MEOX) (5TMS)          | 319 | 21.08 | 1816 | 79.3  |

|                                       |         |    |   |                                                                                                      |     |       |      |       |
|---------------------------------------|---------|----|---|------------------------------------------------------------------------------------------------------|-----|-------|------|-------|
| beta-D-Methylglucopyranoside          | b_MGP   | 4  | - | EIQTMS_203003-101_MST_2036.2_[766; beta-D-Methylglucopyranoside (4TMS)]                              | 319 | 22.12 | 1868 | 85    |
| 2-o-Glycerol-beta-D-galactopyranoside | Gb_GP   | 6  | - | EIQTMS_217004-101_MST_2190.2_[834; 2-O-Glycerol-beta-D-galactopyranoside (6TMS)]                     | 204 | 24.91 | 2152 | 71.69 |
| Gulose                                | Gul     | 5  | - | EIQTMS_260002-101_MST_2593.8_[896; Gulose (5TMS)]                                                    | 204 | 24.97 | 2158 | 78.32 |
| 1-Benzylglucopyranoside               | BenzGP  | -  | - | EIQTMS_241003-101_MST_2408.9_[1-Benzylglucopyranoside]                                               | 204 | 27.47 | 2392 | 78.48 |
| 1-Methyl-beta-D-mannopyranoside       | Mb_MP   | 4  | - | EIQTMS_244002-101_MST_2442.3_[759; 1-Methyl-beta-D-mannopyranoside (4TMS)]                           | 204 | 27.75 | 2417 | 81.35 |
| 2-o-Glycerol-beta-D-Galactopyranoside | Grob_GP | 6  | - | EIQTMS_217004-101_MST_2190.2_[834; 2-O-Glycerol-beta-D-galactopyranoside (6TMS)]                     | 204 | 28.72 | 2504 | 76.54 |
| 1-o-methyl-beta-D-Galactopyranoside   | Ma_GP   | 4  | - | EIQTMS_185010-101_METB_1856.8_Galactopyranoside, 1-O-methyl-, beta-D-(4TMS)                          | 204 | 29.22 | 2552 | 78    |
| Gentiobiose                           | Gen     | 8  | - | EIQTMS_285003-101_METB_2853_Gentiobiose (8TMS) {BP}                                                  | 204 | 29.90 | 2607 | 85    |
| Maltose                               | Mal     | 8  | 1 | EIQTMS_274001-101_METB_2744.6_Maltose, D-(1MEOX) (8TMS)                                              | 204 | 31.20 | 2731 | 74.86 |
| Isomaltose                            | IMal    | 8  | 1 | EIQTMS_287001-101_METB_2885.1_Isomaltose (1MEOX) (8TMS)                                              | 204 | 31.98 | 2796 | 86.6  |
| Melibiose                             | Mel     | 8  | 1 | EINIST_287003-101_METB_2872.6_Melibiose (1MEOX) (8TMS)                                               | 204 | 32.23 | 2835 | 70.75 |
| Raffinose                             | Raf     | 11 | - | EISTR_337002-101_METB_3396_Raffinose (11TMS)                                                         | 361 | 37.02 | 3343 | 92.7  |
| 1-Kestose                             | Kes     | 11 | - | EINIST_24810_METB_3552_a-D-Glucopyranoside, 1,3,4,6,-tetrakis-O-(trimethylsilyl)-a-D-fructofuranosyl | 451 | 37.06 | 3353 | 91.95 |
| Melezitose                            | Mez     | 11 | - | EIQTMS_346001-101_METB_3475.7_Melezitose (11TMS)                                                     | 361 | 37.27 | 2989 | 61.48 |
| <b>Sugar Acid</b>                     |         |    |   |                                                                                                      |     |       |      |       |
| Threonate-1,4-lactone                 | ThrL    | 2  | - | EINIST_140005-101_METB_1382.5_Threonic acid-1,4-lactone (2TMS)                                       | 247 | 12.67 | 1372 | 65.63 |
| Threonate                             | ThrA    | 4  | - | EIQTMS_156001-101_METB_1568.2_Threonic acid (4TMS)                                                   | 292 | 15.83 | 1544 | 84.4  |

|                        |       |   |   |                                                                      |     |       |      |       |
|------------------------|-------|---|---|----------------------------------------------------------------------|-----|-------|------|-------|
| Pentionate-1,4-lactone | PenAL | 3 | - | EITTMS_175004-101_MST_1760.7_[Pentonic acid-1,4-lactone (3TMS)]      | 217 | 17.14 | 1612 | 65.17 |
| 2-Oxogulonate          | 2OG   | 5 | 1 | EIGTMS_186001-101_METB_1868.4_Gulonic acid, 2-oxo-, L-(1MEOX) (5TMS) | 349 | 18.56 | 1685 | 62.16 |
| Galactonate            | GalA  | 6 | - | EINIST_199002-101_METB_1997.9_Galactonic acid (6TMS)                 | 319 | 22.42 | 1885 | 82.66 |
| Gluconate              | GlcA  | 6 | - | EINIST_200001-101_METB_2002.7_Gluconic acid (6TMS)                   | 292 | 22.67 | 1899 | 86.72 |
| <b>Sugar Alcohol</b>   |       |   |   |                                                                      |     |       |      |       |
| Xylitol                | Xiol  | 5 | - | EINIST_171001-101_METB_1717.6_Xylitol (5TMS)                         | 217 | 18.38 | 1676 | 85.46 |
| Ribitol                | Riol  | 5 | - | EINIST_173001-101_ISTD (quantitative)_1734.7_Ribitol, D-(5TMS)       | 217 | 18.46 | 1680 | 85.8  |
| Galactitol             | Gatol | 6 | - | EIROE_194001-101_METB_1941.8_Galactitol, D-(6TMS)                    | 204 | 21.65 | 1846 | 71.09 |
| myo-Inositol           | Ins   | 6 | - | EIQTMS_209002-101_METB_2091.9_Inositol, myo-(6TMS)                   | 305 | 23.72 | 2017 | 88.18 |
| Galactinol             | Gol   | 9 | - | EIQTMS_299002-101_METB_2993.5_Galactinol (9TMS)                      | 204 | 33.57 | 2965 | 88.38 |
| Erythritol             | Eol   | 4 | - | EINIST_150002-101_METB_1510.2_Erythritol (4TMS)                      | 205 | 14.92 | 1497 | 63.74 |
| <b>Organic Acid</b>    |       |   |   |                                                                      |     |       |      |       |
| Malonate               | Mna   | 2 | - | EIQTMS_122003-101_MST_1211.4_Malonic acid (2TMS)                     | 148 | 9.48  | 1197 | 65.65 |
| Succinate              | Succ  | 2 | - | EIMOR_134001-101_METB_1326_Succinic acid (2TMS)                      | 247 | 11.54 | 1310 | 64.25 |
| Glycerate              | Glyc  | 3 | - | EISTR_135003-101_METB_1339.6_Glyceric acid, DL-(3TMS)                | 189 | 11.76 | 1323 | 86.03 |
| Itaconate              | Ita   | 2 | - | EIFIEHN_135004-101_METB_1351.7_Itaconic acid (2TMS)                  | 215 | 12.06 | 1339 | 65.63 |
| Dimethyl maleate       | 2MM   | 2 | - | EINIST_137003-101_METB_1358_Maleic acid, 2-methyl-(2TMS)             | 259 | 12.18 | 1344 | 52.99 |
| Fumarate               | Fum   | 2 | - | EIROE_137001-101_METB_1359.8_Fumaric acid (2TMS)                     | 245 | 12.22 | 1347 | 70.55 |

|                           |         |   |   |                                                                                               |     |       |      |       |
|---------------------------|---------|---|---|-----------------------------------------------------------------------------------------------|-----|-------|------|-------|
| Pipecolate                | Pip     | 2 | - | EINIST_137004-101_MST_1370_Pipecolic acid (2TMS)                                              | 156 | 12.48 | 1362 | 85.07 |
| Malate                    | MalA    | 3 | - | EIQTMS_149001-101_METB_1492.3_Malic acid, DL-(3TMS)                                           | 233 | 14.68 | 1483 | 84.39 |
| Erythronate               | EryA    | 4 | - | EIQTMS_154001-101_MST_1548.7_Erythronic acid (4TMS)                                           | 292 | 15.53 | 1528 | 80.04 |
| cis-Aconitate             | AA      | 3 | - | EISTR_176002-101_METB_1762.8_Aconitic acid, cis-(3TMS)                                        | 229 | 18.99 | 1707 | 81.52 |
| Ribonate                  | RiA     | 5 | - | EINIST_177001-101_MST_1774.2_Ribonic acid (5TMS)                                              | 292 | 19.23 | 1720 | 80.38 |
| Shikimate                 | SA      | 4 | - | EISTR_181002-101_METB_1820.9_Shikimic acid (4TMS)                                             | 204 | 19.83 | 1751 | 75.81 |
| Glucarate                 | GlucA   | 6 | - | EIQTMS_181001-101_MST_1809.8_[752; Glucaric acid (6TMS)]                                      | 292 | 19.91 | 1755 | 70.36 |
| Citrate                   | Cit     | 4 | - | EIQTMS_182004-101_METB/METB_1827.8_Citric acid (4TMS)                                         | 273 | 19.97 | 1758 | 78.07 |
| Quinate                   | Quin    | 5 | - | EIQTMS_185001-101_METB_1862.7_Quinic acid, D(-)-(5TMS)                                        | 345 | 20.49 | 1785 | 78.4  |
| Syringic acid             | SyrA    | 1 | - | EINIST_291991-101_METB_1845_Trimethylsilyl 3,5-dimethoxy-4-(trimethylsilyloxy)benzoate (1TMS) | 327 | 21.24 | 1824 | 57.42 |
| Ascorbate                 | AsA     | 4 | - | EIQTMS_195002-101_METB_1951.1_Ascorbic acid, L(+)-(4TMS)                                      | 332 | 21.82 | 1855 | 65.09 |
| trans-Caffeate            | CafA    | 3 | - | EINIST_214001-101_METB_2141.4_Caffeic acid, trans-(3TMS)                                      | 396 | 24.47 | 2102 | 86.8  |
| Caffeoyl quinate          | Cafquin | 6 | - | EIQTMS_311001-101_METB_3126_Quinic acid, 3-caffeoyl-, trans-(6TMS)                            | 345 | 34.83 | 3101 | 84.77 |
| 4-methoxy-trans-Cinnamate | 4MCA    | 1 | - | EINIST_184010-101_METB_1843.1_Cinnamic acid, 4-methoxy-, trans- (1TMS)                        | 250 | 37.12 | 3355 | 88.01 |
| 2-hydroxy-trans-Cinnamate | 2HCA    | 2 | - | EINIST_188016-101_METB_1878.2_Cinnamic acid, 2-hydroxy-, trans- (2TMS)                        | 308 | 37.15 | 3358 | 58.67 |
| Oxalate                   | OxA     | 2 | - | EIQTMS_113002-101_MST_1134.9_[Oxalic acid (2TMS)]                                             | 190 | 7.03  | 1129 | 92.98 |
| Isocitrate                | Icit    | 4 | - | EIGTMS_182003-101_METB/METB_1831.6_Isocitric acid, DL-(4TMS)                                  | 245 | 20.00 | 1763 | 66.66 |

| <b>Phosphorylated Compound</b>                  |       |   |   |                                                                       |     |       |      |       |
|-------------------------------------------------|-------|---|---|-----------------------------------------------------------------------|-----|-------|------|-------|
| Glycerol-2-phosphate                            | G2P   | 4 | - | EISTR_174002-101_METB_1741.3_Glycerol-2-phosphate (4TMS)              | 243 | 18.52 | 1683 | 70.62 |
| Glycerol-3-Phosphate                            | G3P   | 4 | - | EINIST_177002-101_METB_1775.1_Glycerol-3-phosphate, DL-(4TMS)         | 357 | 19.10 | 1713 | 88.69 |
| 3-Phosphoglycerate                              | 3PGA  | 4 | - | EIROE_181003-101_METB_1817.9_Glyceric acid-3-phosphate (4TMS)         | 217 | 19.80 | 1750 | 66.93 |
| Fructose-6-Phosphate                            | Fru6P | 6 | 1 | EIROE_232002-101_METB_2321.4_Fructose-6-phosphate (1MEOX) (6TMS)      | 245 | 26.40 | 2296 | 58.21 |
| Glucose-6-Phosphate                             | Glc6P | 6 | 1 | EINIST_231001-101_METB_2323.5_Mannose-6-phosphate (1MEOX) (6TMS)      | 387 | 26.55 | 2309 | 86.73 |
| myo-Inositol-1-Phosphate                        | Ins1P | 7 | - | EIQTMS_243001-101_METB_2430.3_Inositol-1-phosphate, myo-(7TMS)        | 318 | 27.67 | 2410 | 70.1  |
| Sugar phosphate (putatively Ribose-5-phosphate) | SPO   | 5 | 1 | EISTR_211003-101_METB_2113.1_Ribose-5-phosphate, D-(1 MEOX) (5TMS)    | 169 | 32.20 | 2829 | 66.87 |
| Adenosine monophosphate                         | AMP   | 5 | - | EISTR_307003-101_METB_3079.1_Adenosine-5-monophosphate (5TMS)         | 315 | 34.45 | 3061 | 76.75 |
| <b>Organic Compound</b>                         |       |   |   |                                                                       |     |       |      |       |
| Urea                                            | Urea  | 2 | - | EINIST_127002-101_METB_1260.1_Urea (2 TMS)                            | 189 | 10.21 | 1237 | 69.61 |
| Nicotinamide                                    | Nam   | 1 | - | EIFIEHN_150004-101_METB_1499.2_Nicotinamide (1TMS)                    | 179 | 14.74 | 1490 | 82.7  |
| 2,4,6-Tri-tert.-butylbenzenethiol               | TTBBT | - | - | EIQTMS_155003-101_MST_1542.3_[786; 2,4,6-Tri-tert.-butylbenzenethiol] | 263 | 15.61 | 1532 | 69.82 |
| Galactosylglycerol                              | GG    | 6 | - | EIQTMS_231002-101_MST_2328.7_[926;Galactosylglycerol (6TMS)]          | 204 | 26.48 | 2303 | 86.93 |
| Phylloquinone                                   | Phq   | 1 | - | EINIST_233846-101_METB_3352_Phylloquinone                             | 450 | 30.21 | 2631 | 53.14 |
| Adenosine                                       | A     | 4 | - | EINIST_265001-101_2650.9_Adenosine (4TMS)                             | 236 | 30.26 | 2642 | 74.51 |
| alpha-Tocopherol                                | a_Tol | 1 | - | EINIST_316001-101_METB_3145.3_Tocopherol, alpha-(1TMS)                | 503 | 35.24 | 3145 | 57.03 |

|                                    |        |   |   |                                                                                                                  |     |       |      |       |
|------------------------------------|--------|---|---|------------------------------------------------------------------------------------------------------------------|-----|-------|------|-------|
| Glycerophosphoglycerol             | GPG    | 5 | - | EIQTMS_220004-101_MST_2203_[755; alpha-Glycerophosphoglycerol (5TMS)]                                            | 357 | 25.07 | 2170 | 72.95 |
| Digalactosylglycerol               | DGG    | 9 | - | EIQTMS_311002-101_MST_3140.1_[Digalactosylglycerol (9TMS)]/[861; beta-D-Galactopyranoside-(1,2)-glycerol (6TMS)] | 204 | 34.81 | 3099 | 88.32 |
| <b>Fatty Acid or Fatty Alcohol</b> |        |   |   |                                                                                                                  |     |       |      |       |
| Palmityl alcohol                   | Pmol   |   | - | EINIST_114116-101_METB_1854_Hexadecan-1-ol                                                                       | 299 | 16.18 | 1551 | 52.6  |
| Coniferyl alcohol                  | Cnol   | 2 | - | EIQTMS_194005-101_METB_1945.7_Coniferylalcohol, trans-(2TMS)                                                     | 204 | 21.85 | 1856 | 58.52 |
| Palmitate                          | FA16_0 | 1 | - | EINIST_205001-101_METB_2050.2_Hexadecanoic acid, n-(1TMS)                                                        | 313 | 23.28 | 1967 | 90.5  |
| Linoleate                          | FA18_2 | 1 | - | EINIST_221003-101_METB_2211.1_Octadecadienoic acid, 9,12-(Z,Z)-,n-(1TMS)                                         | 337 | 25.43 | 2209 | 79.66 |
| Linolenate                         | FA18_3 | 1 | - | EINIST_222003-101_METB_2219.1_Octadecatrienoic acid, 9,12,15-(Z,Z,Z)-,n-(1TMS)                                   | 129 | 25.52 | 2216 | 89.17 |
| Stearate                           | FA18_0 | 1 | - | EINIST_225002-101_METB_2247_Octadecanoic acid, n-(1TMS)                                                          | 341 | 25.82 | 2244 | 88.75 |
| Monopalmitin                       | MP     | 2 | - | EIQTMS_259002-101_MST_2602.7_[872; 1-Monohexadecanoylglycerol (2TMS)]                                            | 371 | 29.73 | 2594 | 73.39 |
| Monostearin                        | MS     | 2 | - | EIQTMS_278004-101_MST_2782.8_[924; 1-Monooctadecanoylglycerol (2TMS)]                                            | 399 | 31.74 | 2774 | 67.84 |
| Stearyl alcohol                    | Stol   | 1 | - | EISTR_215001-101_METB_2154.7_Octadecan-1-ol, n-(1TMS)                                                            | 327 | 33.81 | 2991 | 76.54 |
| Phytol                             | Phol   | 1 | - | EINIST_217006-101_METB_2172.6_Phytol (1TMS)                                                                      | 143 | 14.96 | 1499 | 58.16 |
| Campesterol                        | Cam    | 1 | - | EINIST_319001-101_METB_3262.1_Campesterol (1TMS)                                                                 | 129 | 36.35 | 3268 | 81.8  |
| Fucosterol                         | Fuc    | 1 | - | EIQTMS_337005-101_MST_3367.3_Fucosterol [BP] (1TMS)                                                              | 386 | 37.22 | 3367 | 70.54 |
| beta-Sitosterol                    | b_Sit  | 1 | - | EIQTMS_338002-101_METB_3355.5_beta-Sitosterol (1TMS)                                                             | 129 | 37.09 | 3349 | 92    |
| <b>Inorganic Acid</b>              |        |   |   |                                                                                                                  |     |       |      |       |
| Monomethyl phosphate               | MMPO   | 2 | - | EINIST_119001-101_MST_1182.7_Phosphoric acid monomethyl ester (2TMS)                                             | 241 | 9.01  | 1171 | 86.79 |
| Phosphate                          | PO     | 3 | - | EIQTMS_129001-101_METB_1281.9_Phosphoric acid (3TMS)                                                             | 299 | 10.71 | 1265 | 77.76 |

| Unknown (with mass spectral library identifier, designated as 'NA') |      |   |   |                                   |     |       |      |       |
|---------------------------------------------------------------------|------|---|---|-----------------------------------|-----|-------|------|-------|
| NA1                                                                 | NA1  | - | - | EITCMS_147011-101_MST_1474.9_[NA] | 191 | 14.26 | 1460 | 51.49 |
| NA2                                                                 | NA2  | - | - | EIQCMS_148010-101_MST_1483.8_[NA] | 155 | 14.45 | 1471 | 64.51 |
| NA3                                                                 | NA3  | - | - | EISTR_151009-101_MST_1518_[NA]    | 84  | 15.05 | 1503 | 75.28 |
| NA4                                                                 | NA4  | - | - | EITCMS_159003-101_MST_1586.5_[NA] | 306 | 16.20 | 1563 | 63.39 |
| NA5                                                                 | NA5  | - | - | EITCMS_174004-101_MST_1741.9_[NA] | 357 | 18.66 | 1691 | 72.82 |
| NA6                                                                 | NA6  | - | - | EIQCMS_174001-101_MST_1751_[NA]   | 205 | 18.72 | 1694 | 80.27 |
| NA7                                                                 | NA7  | - | - | EIQCMS_182009-101_MST_1820.4_[NA] | 204 | 19.88 | 1754 | 72.44 |
| NA8                                                                 | NA8  | - | - | EITCMS_187005-101_MST_1878.5_[NA] | 275 | 20.76 | 1799 | 70.54 |
| NA9                                                                 | NA9  | - | - | EIQCMS_192013-101_MST_1922.2_[NA] | 205 | 21.21 | 1823 | 60.5  |
| NA10                                                                | NA10 | - | - | EIQCMS_196015-101_MST_1961.9_[NA] | 217 | 21.96 | 1861 | 79.33 |
| NA11                                                                | NA11 | - | - | EIQCMS_197007-101_MST_1979.3_[NA] | 217 | 22.17 | 1872 | 79.52 |
| NA12                                                                | NA12 | - | - | EIQCMS_200003-101_MST_2003.7_[NA] | 447 | 22.56 | 1893 | 70.69 |
| NA13                                                                | NA13 | - | - | EIQCMS_201005-101_MST_2012.3_[NA] | 297 | 22.61 | 1896 | 51.5  |
| NA14                                                                | NA14 | - | - | EIQCMS_203005-101_MST_2029.9_[NA] | 393 | 22.84 | 1916 | 81.18 |
| NA15                                                                | NA15 | - | - | EIQCMS_207006-101_MST_2070.5_[NA] | 143 | 23.33 | 1978 | 61.93 |
| NA16                                                                | NA16 | - | - | EIQCMS_194007-101_MST_1940.3_[NA] | 204 | 23.54 | 1991 | 88    |
| NA17                                                                | NA17 | - | - | EIQCMS_211010-101_MST_2114.4_[NA] | 319 | 23.92 | 2040 | 78.42 |
| NA18                                                                | NA18 | - | - | EIQCMS_211010-101_MST_2114.4_[NA] | 262 | 24.23 | 2075 | 77.97 |



|      |      |   |   |                                   |     |       |      |       |
|------|------|---|---|-----------------------------------|-----|-------|------|-------|
| NA19 | NA19 | - | - | EIQTMS_214003-101_MST_2140.2_[NA] | 205 | 24.31 | 2082 | 92    |
| NA20 | NA20 | - | - | EIQTMS_211010-101_MST_2114.4_[NA] | 320 | 24.36 | 2089 | 76.41 |
| NA21 | NA21 | - | - | EIQTMS_214003-101_MST_2140.2_[NA] | 319 | 24.44 | 2098 | 77.35 |
| NA22 | NA22 | - | - | EITTMS_221004-101_MST_2216.1[NA]  | 205 | 25.02 | 2164 | 78    |
| NA23 | NA23 | - | - | EITTMS_221004-101_MST_2216.1[NA]  | 342 | 25.32 | 2199 | 65.3  |
| NA24 | NA24 | - | - | EIQTMS_224002-101_MST_2249_[NA]   | 204 | 25.91 | 2245 | 54.25 |
| NA25 | NA25 | - | - | EIQTMS_228001-101_MST_2287_[NA]   | 290 | 26.06 | 2266 | 79.25 |
| NA26 | NA26 | - | - | EIQTMS_211010-101_MST_2114.4_[NA] | 217 | 26.20 | 2277 | 63.59 |
| NA27 | NA27 | - | - | EIQTMS_239004-101_MST_2390.6_[NA] | 204 | 26.28 | 2285 | 81.88 |
| NA28 | NA28 | - | - | EIQTMS_237002-101_MST_2371.3_[NA] | 204 | 26.68 | 2352 | 79.9  |
| NA29 | NA29 | - | - | EIQTMS_239004-101_MST_2390.6_[NA] | 217 | 27.03 | 2361 | 80.8  |
| NA30 | NA30 | - | - | EIQTMS_239008-101_MST_2395.4_[NA] | 217 | 27.22 | 2369 | 80.6  |
| NA31 | NA31 | - | - | EIQTMS_242009-101_MST_2429.6_[NA] | 204 | 27.61 | 2404 | 83.28 |
| NA32 | NA32 | - | - | EIQTMS_242009-101_MST_2429.6_[NA] | 157 | 27.69 | 2412 | 68.91 |
| NA33 | NA33 | - | - | EIQTMS_271004-101_MST_2712.3_[NA] | 204 | 28.03 | 2442 | 78.95 |
| NA34 | NA34 | - | - | EIQTMS_245005-101_MST_2453.1_[NA] | 497 | 28.06 | 2445 | 68.3  |
| NA35 | NA35 | - | - | EIQTMS_252005-101_MST_2527_[NA]   | 204 | 28.63 | 2495 | 86.5  |
| NA36 | NA36 | - | - | EIQTMS_271007-101_MST_2714.1_[NA] | 217 | 28.79 | 2515 | 55.72 |
| NA37 | NA37 | - | - | EITTMS_261001-101_MST_2618.2_[NA] | 204 | 29.08 | 2524 | 63.59 |

|      |      |   |   |                                   |     |       |      |       |
|------|------|---|---|-----------------------------------|-----|-------|------|-------|
| NA38 | NA38 | - | - | EIQTMS_267006-101_MST_2678.6_[NA] | 205 | 29.14 | 2542 | 70.89 |
| NA40 | NA40 | - | - | EIQTMS_267006-101_MST_2678.6_[NA] | 204 | 30.31 | 2646 | 86.12 |
| NA41 | NA41 | - | - | EIQTMS_268004-101_MST_2686.8_[NA] | 204 | 30.41 | 2655 | 85.09 |
| NA42 | NA42 | - | - | EIQTMS_271008-101_MST_2716.3_[NA] | 204 | 30.56 | 2669 | 72.72 |
| NA43 | NA43 | - | - | EIQTMS_268004-101_MST_2686.8_[NA] | 204 | 30.68 | 2679 | 85.76 |
| NA44 | NA44 | - | - | EIQTMS_270003-101_MST_2700.2_[NA] | 217 | 30.73 | 2684 | 72.96 |
| NA45 | NA45 | - | - | EIQTMS_272009-101_MST_2722.6_[NA] | 217 | 30.85 | 2694 | 78.3  |
| NA46 | NA46 | - | - | EIQTMS_270003-101_MST_2700.2_[NA] | 361 | 30.89 | 2701 | 67.3  |
| NA47 | NA47 | - | - | EITTMS_273004-101_MST_2726.4_[NA] | 217 | 30.92 | 2706 | 74.56 |
| NA48 | NA48 | - | - | EIQTMS_271005-101_MST_2712.2_[NA] | 204 | 30.97 | 2720 | 62.66 |
| NA49 | NA49 | - | - | EIQTMS_271004-101_MST_2712.3_[NA] | 204 | 31.44 | 2741 | 66.51 |
| NA50 | NA50 | - | - | EIQTMS_201005-101_MST_2012.3_[NA] | 297 | 32.09 | 2809 | 55.98 |
| NA51 | NA51 | - | - | EIQTMS_286005-101_MST_2866.5_[NA] | 361 | 32.40 | 2840 | 66.45 |
| NA52 | NA52 | - | - | EIQTMS_201005-101_MST_2012.3_[NA] | 297 | 32.56 | 2856 | 65.6  |
| NA53 | NA53 | - | - | EITTMS_314002-101_MST_3145.5_[NA] | 384 | 32.57 | 2858 | 54.37 |
| NA54 | NA54 | - | - | EIQTMS_271004-101_MST_2712.3_[NA] | 204 | 32.60 | 2862 | 71.35 |
| NA55 | NA55 | - | - | EITTMS_288004-101_MST_2882.6_[NA] | 361 | 32.70 | 2873 | 67.79 |
| NA56 | NA56 | - | - | EIQTMS_290007-101_MST_2906.3_[NA] | 204 | 32.74 | 2877 | 63.13 |
| NA57 | NA57 | - | - | EIQTMS_292006-101_MST_2929.5_[NA] | 204 | 32.91 | 2895 | 82.54 |

|                                                         |      |   |   |                                   |     |       |      |       |
|---------------------------------------------------------|------|---|---|-----------------------------------|-----|-------|------|-------|
| NA58                                                    | NA58 | - | - | EIQTMS_201005-101_MST_2012.3_[NA] | 297 | 33.15 | 2921 | 78.53 |
| NA59                                                    | NA59 | - | - | EIQTMS_201005-101_MST_2012.3_[NA] | 297 | 33.43 | 2951 | 70.18 |
| NA60                                                    | NA60 | - | - | EITTMS_279003-101_MST_2794.4_[NA] | 204 | 33.66 | 2997 | 66.58 |
| NA61                                                    | NA61 | - | - | EIQTMS_318004-101_MST_3181.7_[NA] | 133 | 35.43 | 3166 | 66.9  |
| NA62                                                    | NA62 | - | - | EITTMS_310001-101_MST_3107_[A1]   | 249 | 35.53 | 3176 | 69.77 |
| NA63                                                    | NA63 | - | - | EIQTMS_239008-101_MST_2395.4_[NA] | 204 | 36.95 | 3335 | 64.75 |
| <b>Unknown (not found in any mass spectral library)</b> |      |   |   |                                   |     |       |      |       |
| Unknown 1                                               | U1   | - | - | -                                 | 246 | 12.83 | 1401 | -     |
| Unknown 2                                               | U2   | - | - | -                                 | 449 | 22.78 | 1898 | -     |
| Unknown 3                                               | U3   | - | - | -                                 | 361 | 22.25 | 1880 | -     |
| Unknown 4                                               | U4   | - | - | -                                 | 216 | 23.94 | 2045 | -     |
| Unknown 5                                               | U5   | - | - | -                                 | 319 | 24.13 | 2060 | -     |
| Unknown 6                                               | U6   | - | - | -                                 | 259 | 25.94 | 2255 | -     |
| Unknown 7                                               | U7   | - | - | -                                 | 259 | 26.00 | 2269 | -     |
| Unknown 8                                               | U8   | - | - | -                                 | 204 | 27.13 | 2365 | -     |
| Unknown 9                                               | U9   | - | - | -                                 | 123 | 27.57 | 2389 | -     |
| Unknown 10                                              | U10  | - | - | -                                 | 204 | 28.46 | 2465 | -     |
| Unknown 11                                              | U11  | - | - | -                                 | 361 | 29.46 | 2601 | -     |
| Unknown 12                                              | U12  | - | - | -                                 | 361 | 29.52 | 2645 | -     |

|            |     |   |   |   |     |       |      |   |
|------------|-----|---|---|---|-----|-------|------|---|
| Unknown 13 | U13 | - | - | - | 217 | 29.59 | 2657 | - |
| Unknown 14 | U14 | - | - | - | 204 | 31.51 | 2850 | - |
| Unknown 15 | U15 | - | - | - | 361 | 31.59 | 2869 | - |
| Unknown 16 | U16 | - | - | - | 361 | 31.77 | 2884 | - |
| Unknown 17 | U17 | - | - | - | 204 | 32.43 | 2846 | - |
| Unknown 18 | U18 | - | - | - | 267 | 32.48 | 2855 | - |
| Unknown 19 | U19 | - | - | - | 361 | 32.65 | 2869 | - |
| Unknown 20 | U20 | - | - | - | 204 | 32.83 | 2885 | - |
| Unknown 21 | U21 | - | - | - | 204 | 33.11 | 2913 | - |
| Unknown 22 | U22 | - | - | - | 218 | 37.40 | 3378 | - |
| Unknown 23 | U23 | - | - | - | 531 | 37.55 | 3398 | - |
| Unknown 24 | U24 | - | - | - | 437 | 37.66 | 3407 | - |
| Unknown 25 | U25 | - | - | - | 361 | 37.87 | 3519 | - |
| Unknown 26 | U26 | - | - | - | 217 | 19.07 | 1720 | - |
| Unknown 27 | U27 | - | - | - | 246 | 20.21 | 1772 | - |
| Unknown 28 | U28 | - | - | - | 204 | 24.55 | 2098 | - |
| Unknown 27 | U29 | - | - | - | 267 | 31.89 | 2778 | - |
| Unknown 30 | U30 | - | - | - | 249 | 33.54 | 2960 | - |

Supplemental Table 2: List of yield and yield-related traits measured for 179 lines of the Excalibur/Kukri doubled haploid population

| TRAIT NAME                              | ABBREVIATION | DESCRIPTION                                                                                                                                                                                                                                                                                                                                                                                                                                                                                                                                                                                                                                                                                                              |
|-----------------------------------------|--------------|--------------------------------------------------------------------------------------------------------------------------------------------------------------------------------------------------------------------------------------------------------------------------------------------------------------------------------------------------------------------------------------------------------------------------------------------------------------------------------------------------------------------------------------------------------------------------------------------------------------------------------------------------------------------------------------------------------------------------|
| <b>Thermal Time to Heading</b>          | TTH          | TTH refers to the duration to heading, but minimizes the differences in response to photoperiod due to fluctuations in temperature during growth. Thermal time to heading is calculated as $\sum [0.5(T_{max}-T_{min})-T_b]$ , where $T_{max}$ and $T_{min}$ are the daily maximum and minimum temperatures, and $T_b=0^{\circ}\text{C}$ is the base temperature.                                                                                                                                                                                                                                                                                                                                                        |
| <b>Glaucousness</b>                     | Gla          | Glaucousness (waxiness) is caused by an increase presence of epicuticular wax on the leaves. The glaucousness of the plants was scored, at anthesis, by visual assessment on a 1 to 9 scale: (1) Non glaucous; (2) Glaucous stem; (3) As 2, plus up to $\frac{1}{4}$ of the flag leaf's abaxial surface; (4) As 2, plus $\frac{1}{4}$ to $\frac{3}{4}$ of the flag leaf's abaxial surface; (5) As 2, plus all of the leaf's abaxial surface; (6) As 5, plus up to $\frac{1}{4}$ of the flag leaf's adaxial surface; (7) As 5, plus up to $\frac{1}{2}$ of the flag leaf's adaxial surface; (8) As 5, plus up to $\frac{3}{4}$ of the flag leaf's adaxial surface; (9) As 5, plus all of the flag leaf's adaxial surface. |
| <b>Leaf rolling 12_09_06</b>            | Lfr1         | Leaf rolling measured at the first scoring date. Leaf rolling was scored by visual assessment using a 5 point scale developed by O'Toole et al. (1979).                                                                                                                                                                                                                                                                                                                                                                                                                                                                                                                                                                  |
| <b>Leaf rolling 18_09_06</b>            | Lfr2         | Leaf rolling measured at the second scoring date. Leaf rolling was scored by visual assessment using a 5 point scale developed by O'Toole et al. (1979).                                                                                                                                                                                                                                                                                                                                                                                                                                                                                                                                                                 |
| <b>Chlorophyll 1</b>                    | SPAD1        | Chlorophyll content (SPAD) of flag leaves at the first scoring date. The chlorophyll content (SPAD) of flag leaves was measured during anthesis using a hand held SPAD-502 chlorophyll meter (Konica, Minolta, Tokyo, Japan). One measurement was taken on six flag leaves and the average recorded. This was repeated twice per plot, and repeated if the readings differed by $> 2$ units.                                                                                                                                                                                                                                                                                                                             |
| <b>Chlorophyll 2</b>                    | SPAD2        | Chlorophyll content (SPAD) of flag leaves at the second scoring date.                                                                                                                                                                                                                                                                                                                                                                                                                                                                                                                                                                                                                                                    |
| <b>Crown rot</b>                        | CR           | The damage caused by the fungus <i>Fusarium pseudograminearum</i> was scored visually on a 1 to 9 scale, where a 9 score is equal to or greater than 90% of the plants being infected.                                                                                                                                                                                                                                                                                                                                                                                                                                                                                                                                   |
| <b>Days to senescence</b>               | DS           | Days to senescence of the plant.                                                                                                                                                                                                                                                                                                                                                                                                                                                                                                                                                                                                                                                                                         |
| <b>Flag leaf length</b>                 | Flth         | The flag leaf length was measured on five randomly selected plants from each plot.                                                                                                                                                                                                                                                                                                                                                                                                                                                                                                                                                                                                                                       |
| <b>Head length</b>                      | Hlth         | The head length was measured on five randomly selected plants from each plot.                                                                                                                                                                                                                                                                                                                                                                                                                                                                                                                                                                                                                                            |
| <b>Peduncle length</b>                  | Plth         | The peduncle length (Plth) (the distance between the final node and the head) was measured on five randomly selected plants from each plot.                                                                                                                                                                                                                                                                                                                                                                                                                                                                                                                                                                              |
| <b>Plant height</b>                     | Ht           | Plant height was measured at physiological maturity from the soil surface to the tip of the head, excluding awns (cm).                                                                                                                                                                                                                                                                                                                                                                                                                                                                                                                                                                                                   |
| <b>Number of tillers</b>                | Tl           | The tiller counts, on one meter sections of two rows within each plot, were conducted during stem elongation. The location was marked, and the number of tillers remaining at physiological maturity was counted.                                                                                                                                                                                                                                                                                                                                                                                                                                                                                                        |
| <b>Number of aborted tillers</b>        | Atl          | Number of aborted tillers.                                                                                                                                                                                                                                                                                                                                                                                                                                                                                                                                                                                                                                                                                               |
| <b>Infertile florets</b>                | InfFl        | Number of infertile florets.                                                                                                                                                                                                                                                                                                                                                                                                                                                                                                                                                                                                                                                                                             |
| <b>Thousand grain weight (5 Plants)</b> | Tgw5P        | Weight of a thousand grain sample (g), five plants                                                                                                                                                                                                                                                                                                                                                                                                                                                                                                                                                                                                                                                                       |

Supplemental Table 2: continued

| TRAIT NAME                      | ABBREVIATION | DESCRIPTION                                                                                                                                                                                                                                       |
|---------------------------------|--------------|---------------------------------------------------------------------------------------------------------------------------------------------------------------------------------------------------------------------------------------------------|
| <b>Fertile seeds per spike</b>  | Fsp          | Number of fertile seeds per spike.                                                                                                                                                                                                                |
| <b>Yield/kg ha<sup>-1</sup></b> | Yld          | The plots were machine harvested and the grain cleaned. The cleaned samples were weighed to calculate the grain yield expressed in Kg per hectare                                                                                                 |
| <b>Thousand grain weight</b>    | Tgw          | Weight of a thousand grain sample (g), one plant                                                                                                                                                                                                  |
| <b>Total seeds per spike</b>    | Sp           | Number of seeds per spike                                                                                                                                                                                                                         |
| <b>Spikes per m<sup>2</sup></b> | SpM2         | Spike number per meter square                                                                                                                                                                                                                     |
| <b>Grains per m<sup>2</sup></b> | Gm2          | Grain number per meter square                                                                                                                                                                                                                     |
| <b>Grain size G2.8</b>          | G2.8         | Percentage of grain that does not fall through a sieve with holes of 2.8 mm (grain size larger than 2.8mm).                                                                                                                                       |
| <b>Grain size G2.5</b>          | G2.5         | Percentage of grain that does not fall through a sieve with holes of 2.5 mm (grain size larger than 2.5mm).                                                                                                                                       |
| <b>Grain size G2.2</b>          | G2.2         | Percentage of grain that does not fall through a sieve with holes of 2.2 mm (grain size larger than 2.2mm).                                                                                                                                       |
| <b>Screenings L2.2</b>          | L2.2         | Percentage of unmillable material that falls through a sieve ('screen') with holes of 2.2 mm.                                                                                                                                                     |
| <b>Test weight</b>              | Hlwt         | Test weight measures the density of grain and is calculated as kg/hL. This is measured by weighing a half liter measure of grain in grams; and dividing the weight by five. It serves as an indication of milling potential of a parcel of wheat. |
| <b>Harvest index</b>            | Hi           | Two one meter rows were cut just prior to harvest, weighed and threshed. The threshed grain was weighed and the harvest index (Hi) calculated as the weight of the grain as a percentage of the total weight.                                     |
| <b>Total Biomass</b>            | Bm           | Above ground biomass at physiological maturity.                                                                                                                                                                                                   |

O'Toole JC, Cruz RT, Singh TN (1979) Leaf rolling and transpiration. *Plant Science Letters* 16:111-114

Supplemental Table 3: Chromosome position, marker interval, LOD values and trait heritabilities for the metabolic QTL. Genetic variance: the percentage of genetic variance explained by a QTL

| TRAIT NAME              | QTL NAME          | H <sup>2</sup> | INTERVAL             | POSITION(cM)  | ALLELE | LOD  | GENETIC VARIANCE |
|-------------------------|-------------------|----------------|----------------------|---------------|--------|------|------------------|
| <b>Malonate</b>         | <i>QMna-2A</i>    | 0.58           | wmc667–WPT-9961      | 20.34–47.38   | KUKRI  | 2.28 | 14.34            |
|                         | <i>QMna-5B</i>    |                | WPT-1457–barc0112    | 70.32–75.02   | EXCAL  | 1.79 | 9.18             |
|                         | <i>QMna-7DS</i>   |                | CFD0021B–WPT-0789    | 88.75–92.43   | KUKRI  | 2.49 | 11.10            |
| <b>Phosphate</b>        | <i>QPo-2A</i>     | 0.51           | WPT-1657–GWM0312     | 86.43–112.98  | EXCAL  | 1.66 | 6.58             |
|                         | <i>QPo-2B</i>     |                | BARC0101–WPT-1140    | 129.35–132.37 | EXCAL  | 1.76 | 7.06             |
|                         | <i>QPo-4B</i>     |                | WPT-7062–WPT-8756    | 33.08–62.15   | KUKRI  | 1.18 | 6.12             |
|                         | <i>QPo-6A</i>     |                | barc0113–WPT-8662    | 59.81–69.46   | EXCAL  | 3.00 | 10.48            |
|                         | <i>QPo-7A</i>     |                | wmc0283–BS00010307   | 81.23–102.67  | KUKRI  | 4.35 | 18.28            |
| <b>Glycerate</b>        | <i>QGlyc-4D</i>   | 0.72           | WPT-5809–WPT-0877    | 6.3–41.59     | EXCAL  | 1.77 | 10.00            |
|                         | <i>QGlyc-6A.1</i> |                | WPT-9132–CFD0001C    | 24.78–27.18   | KUKRI  | 2.12 | 9.14             |
|                         | <i>QGlyc-6A.2</i> |                | WPT-4229–WPT-5885    | 117.53–121.22 | KUKRI  | 1.39 | 5.96             |
| <b>Itaconate</b>        | <i>QIta-2A</i>    | 0.45           | GWM0312–stm0761tcac  | 112.98–117.9  | EXCAL  | 3.58 | 14.45            |
|                         | <i>QIta-4A</i>    |                | stm0092tctg–GWM0428B | 0–11.9        | EXCAL  | 2.82 | 12.33            |
|                         | <i>QIta-5A</i>    |                | WPT-9834–CFA2141     | 143.98–148.53 | EXCAL  | 2.28 | 9.37             |
|                         | <i>QIta-7A</i>    |                | gwm0060–wmc0283      | 80.16–81.23   | KUKRI  | 5.05 | 22.13            |
|                         | <i>QIta-7DL</i>   |                | WPT-5674–CFD0083A    | 24.51–31.51   | KUKRI  | 1.27 | 5.23             |
| <b>Dimethyl maleate</b> | <i>Q2mm-2A</i>    | 0.47           | WPT-1657–GWM0312     | 86.43–112.98  | EXCAL  | 1.77 | 10.48            |
|                         | <i>Q2mm-4A</i>    |                | GWM0428B–BARC0106    | 11.9–12.59    | EXCAL  | 5.31 | 22.52            |
|                         | <i>Q2mm-7A</i>    |                | gwm0060–wmc0283      | 80.16–81.23   | KUKRI  | 4.46 | 21.28            |
| <b>Pipecolate</b>       | <i>QPip-2A</i>    | 0.73           | WPT-9961–WPT-7626    | 47.38–57.16   | EXCAL  | 1.75 | 1.93             |
|                         | <i>QPip-4B</i>    |                | WMC0047–WMC0349A     | 22.04–23.73   | EXCAL  | 5.01 | 6.90             |
|                         | <i>QPip-4D.1</i>  |                | WMC0457–WPT-5809     | 5.04–6.3      | EXCAL  | 6.73 | 28.06            |
|                         | <i>QPip-4D.2</i>  |                | WPT-5809–WPT-0877    | 6.3–41.59     | KUKRI  | 0.96 | 5.88             |
|                         | <i>QPip-7A</i>    |                | gwm0060–wmc0283      | 80.16–81.23   | KUKRI  | 4.86 | 4.75             |
| <b>Aspartate</b>        | <i>QAsp-1AS</i>   | 0.54           | cwem0012–PSP2999     | 6.07–11.13    | KUKRI  | 2.08 | 11.45            |
|                         | <i>QAsp-3D</i>    |                | BARC0042–CFD0223A    | 6.24–25.99    | EXCAL  | 1.63 | 9.06             |

|                                          |                  |      |                       |               |       |      |       |
|------------------------------------------|------------------|------|-----------------------|---------------|-------|------|-------|
|                                          | <i>QAsp-6A</i>   |      | barc0113-WPT-8662     | 59.81–69.46   | EXCAL | 1.86 | 10.31 |
| <b>Malate</b>                            | <i>QMala-5DL</i> | 0.72 | barc0239-BARC0286     | 39.33–40.47   | KUKRI | 3.47 | 7.29  |
|                                          | <i>QMala-7A</i>  |      | BS00010307-BS00010605 | 102.67–106.88 | EXCAL | 6.34 | 15.02 |
| <b>Phytol</b>                            | <i>QPhol-1AS</i> | 0.57 | WPT-9592-WPT-6455     | 75.24–80.53   | EXCAL | 1.55 | 4.73  |
|                                          | <i>QPhol-2D</i>  |      | WPT-2644-WPT-4413     | 30.23–48.92   | KUKRI | 1.80 | 6.20  |
|                                          | <i>QPhol-4A</i>  |      | stm0506tgag-WPT-2788  | 14.76–42.83   | KUKRI | 3.58 | 13.22 |
|                                          | <i>QPhol-5B</i>  |      | WPT-4936-WPT-3661     | 89.13–95.82   | EXCAL | 3.63 | 11.29 |
|                                          | <i>QPhol-7DS</i> |      | stm0789tcacA-GWM0437  | 99.45–112.57  | EXCAL | 1.86 | 5.62  |
| <b>GABA</b>                              | <i>QGABA-4A</i>  | 0.47 | WPT-0817-barc0343     | 89.4–102.66   | KUKRI | 4.31 | 16.44 |
| <b>Erythronate</b>                       | <i>QEryA-3B</i>  | 0.66 | WPT-5390- WMC0307     | 128.99–130.42 | EXCAL | 2.67 | 7.21  |
|                                          | <i>QEryA-4B</i>  |      | WPT-8756-WPT-1272     | 62.15–68.1    | EXCAL | 1.96 | 6.05  |
|                                          | <i>QEryA-5B</i>  |      | WPT-4936-WPT-3661     | 89.13–95.82   | EXCAL | 3.52 | 9.85  |
|                                          | <i>QEryA-7A</i>  |      | BS00010605-BS00009978 | 106.88–107.8  | EXCAL | 6.48 | 18.80 |
|                                          | <i>QEryA-7DS</i> |      | WPT-2551-gdm0088      | 3.04–36.03    | EXCAL | 2.40 | 8.29  |
| <b>2,4,6-Tri.tert.-butylbenzenethiol</b> | <i>QTtbt-7DL</i> | 0.32 | WPT-5674-CFD0083A     | 24.51– 31.51  | EXCAL | 1.15 | 29.06 |
| <b>Glutamine</b>                         | <i>QGln-2A</i>   | 0.68 | stm0761tcac-gdm0093   | 117.9–164.74  | EXCAL | 4.49 | 15.06 |
|                                          | <i>QGln-2B</i>   |      | WPT-9668-WPT-5707     | 77.23–78.04   | KUKRI | 2.78 | 7.08  |
|                                          | <i>QGln-4D</i>   |      | WPT-5809-WPT-0877     | 6.3–41.59     | EXCAL | 1.73 | 5.44  |
|                                          | <i>QGln-5A</i>   |      | Vrn1A-WPT-9834        | 132.14–143.98 | EXCAL | 3.04 | 7.08  |
|                                          | <i>QGln-7A</i>   |      | gwm0060-wmc0283       | 80.16–81.23   | KUKRI | 4.72 | 10.56 |
| <b>Xylitol</b>                           | <i>QXiol-1AL</i> | 0.58 | WPT-6005- WPT-2855    | 19.58–25.66   | KUKRI | 1.34 | 21.79 |
| <b>2-Oxogulonate</b>                     | <i>Q2OG-3B</i>   | 0.54 | WPT-5064-BARC0131     | 71.07–77.66   | KUKRI | 1.74 | 9.58  |
|                                          | <i>Q2OG-6B</i>   |      | WPT-2587-WPT-4764     | 75.45–81.5    | EXCAL | 3.14 | 18.39 |
| <b>cis-Aconitate</b>                     | <i>QAA-2B</i>    | 0.63 | WPT-9668-WPT-5707     | 77.23–78.04   | KUKRI | 1.84 | 7.02  |
|                                          | <i>QAA-3A</i>    |      | WPT-9215-WPT-3816     | 80.05–109.35  | EXCAL | 2.12 | 8.86  |
|                                          | <i>QAA-5A</i>    |      | WPT-0373-wmc0075b     | 126.71–130.48 | EXCAL | 1.64 | 5.08  |
|                                          | <i>QAA-7A</i>    |      | gwm0060-wmc0283       | 80.16–81.23   | KUKRI | 5.24 | 17.30 |
|                                          | <i>QAA-7DS</i>   |      | stm0789tcacA-GWM0437  | 99.45–112.57  | KUKRI | 2.93 | 9.39  |
| <b>Ribonate</b>                          | <i>QRiA-1AL</i>  | 0.52 | WPT-0432-WPT-6005     | 19.12–19.58   | KUKRI | 1.05 | 7.13  |
|                                          | <i>QRiA-6A</i>   |      | WPT-5885-WPT-8439     | 121.22–122.4  | KUKRI | 2.30 | 14.97 |



|                                                          |                   |      |                       |               |       |      |       |
|----------------------------------------------------------|-------------------|------|-----------------------|---------------|-------|------|-------|
|                                                          | <i>QRiA-7DS</i>   |      | WPT-2551-gdm0088      | 3.04–36.03    | EXCAL | 1.50 | 12.16 |
| <b>3-Phosphoglycerate</b>                                | <i>Q3PGA-2A</i>   | 0.45 | WPT-7626- wmc177      | 57.16–75.63   | EXCAL | 1.88 | 15.30 |
|                                                          | <i>Q3PGA 5B</i>   |      | GWM0540- BARC0088A    | 66.58–67.64   | KUKRI | 2.01 | 15.06 |
| <b>Arginine</b>                                          | <i>QArg-1As</i>   | 0.73 | cwem0012-PSP2999      | 6.07–11.13    | KUKRI | 1.92 | 14.16 |
| <b>Quinate</b>                                           | <i>QQuin-3B</i>   | 0.65 | WPT-5390-WMC0307      | 128.99–130.42 | EXCAL | 4.22 | 20.78 |
| <b>Fructose</b>                                          | <i>QFruc-4B</i>   | 0.48 | WPT-0037-WPT-3608     | 0–14.18       | KUKRI | 2.16 | 9.02  |
|                                                          | <i>QFruc-4D</i>   |      | WMC0457-WPT-5809      | 5.04–6.3      | KUKRI | 1.14 | 3.14  |
|                                                          | <i>QFruc-7A</i>   |      | wmc0283-BS00010307    | 81.23–102.67  | EXCAL | 4.49 | 16.46 |
| <b>Tyrosine</b>                                          | <i>QTyr-7A</i>    | 0.65 | BS00010307-BS00010605 | 102.67–106.88 | EXCAL | 3.40 | 7.69  |
| <b>Coniferyl alcohol</b>                                 | <i>QCnol-2B</i>   | 0.41 | GWM0257-WPT-9423      | 71.86–72.98   | EXCAL | 1.82 | 11.82 |
|                                                          | <i>QCnol-7A</i>   |      | BS00010605-BS00009978 | 106.88–107.8  | EXCAL | 2.69 | 18.28 |
|                                                          | <i>QCnol-7B</i>   |      | WPT-8938-WPT-0722     | 132.41–164.08 | KUKRI | 1.99 | 17.57 |
| <b>Galactonate</b>                                       | <i>QGAlA-5B</i>   | 0.43 | stm0661acag- barc0156 | 160.75–164.42 | EXCAL | 1.20 | 22.61 |
| <b><math>\beta</math>-Sitosterol</b>                     | <i>QBsit-2B</i>   | 0.82 | WPT-0950-WPT-2854     | 140.13–142.62 | EXCAL | 4.59 | 10.98 |
| <b>Myo-Inositol</b>                                      | <i>QIns-1B</i>    | 0.48 | WPT-1374-BARC0137     | 50.6–51.77    | EXCAL | 2.83 | 17.55 |
|                                                          | <i>QIns-6A</i>    |      | WPT-7820-DuPw0254     | 50.69–54.3    | EXCAL | 1.66 | 9.99  |
|                                                          | <i>QIns-7B</i>    |      | WPT-1826-WPT-9925     | 101.36–107.08 | KUKRI | 2.72 | 18.18 |
| <b>2-o-Glycerol-<math>\beta</math>-galactopyranoside</b> | <i>QGbgp-3A</i>   | 0.58 | WMC0532-WPT-0714      | 29.42–41.02   | EXCAL | 2.54 | 19.09 |
| <b>Linoleate</b>                                         | <i>FA18_2-7A</i>  | 0.54 | STM0511TCTG-BARC0282  | 121.07–130.65 | KUKRI | 3.53 | 21.48 |
| <b>Fructose-6-Phosphate</b>                              | <i>QF6p-1B</i>    | 0.41 | WPT-1684-WPT-1374     | 40.86–50.6    | EXCAL | 1.72 | 14.82 |
|                                                          | <i>QF6p-5B</i>    |      | WPT-4936-WPT-3661     | 89.13–95.82   | KUKRI | 2.89 | 21.00 |
| <b>Glucose-6-Phosphate</b>                               | <i>QG6p-7A</i>    | 0.64 | WMC0083-STM0511TCTG   | 119.44–121.07 | EXCAL | 2.67 | 19.22 |
| <b>1-Benzylglucopyranoside</b>                           | <i>QBenzgp-2D</i> | 0.40 | WPT-3757-CFD0050A     | 96.11–98.81   | EXCAL | 2.26 | 10.44 |
|                                                          | <i>QBenzgp-5B</i> |      | WPT-6726-WPT-4936     | 78.79–89.13   | EXCAL | 3.13 | 15.40 |
| <b>Adenosine</b>                                         | <i>QA-4D</i>      | 0.63 | barc0098-WMC0457      | 0–5.04        | EXCAL | 0.89 | 7.24  |
|                                                          | <i>QA-5B</i>      |      | WPT-9666-WPT-5914     | 51.97–59.54   | EXCAL | 1.30 | 12.74 |
| <b>Maltose</b>                                           | <i>QMal-1B</i>    | 0.49 | WPT-0705-WPT-9809     | 62.89–103.86  | EXCAL | 3.08 | 15.17 |
|                                                          | <i>QMal-7A</i>    |      | BS00010605-BS00009978 | 106.88–107.8  | EXCAL | 8.68 | 28.96 |
| <b>Monostearin</b>                                       | <i>QMs-1AL</i>    | 0.41 | WPT-0128-WPT-1011     | 0–13.97       | EXCAL | 1.71 | 11.41 |
|                                                          | <i>QMs-7A</i>     |      | BS00010605-BS00009978 | 106.88–107.8  | EXCAL | 3.98 | 26.01 |

|                                       |                    |      |                        |               |       |      |       |
|---------------------------------------|--------------------|------|------------------------|---------------|-------|------|-------|
| <b>Galactinol</b>                     | <i>QGol-2B</i>     | 0.37 | barc1027-BARC0160      | 110.23–116.69 | KUKRI | 2.33 | 19.67 |
|                                       | <i>QGol-4D</i>     |      | WPT-5809-WPT-0877      | 6.3–41.59     | EXCAL | 1.53 | 15.11 |
| <b>Stearyl alcohol</b>                | <i>QStol-5A</i>    | 0.55 | wmc0075b-Vrn1A         | 130.48–132.14 | KUKRI | 1.49 | 6.57  |
|                                       | <i>QStol-7A</i>    |      | BS00010605-BS00009978  | 106.88–107.8  | EXCAL | 6.20 | 34.49 |
| <b>Glycine</b>                        | <i>QGly-2D</i>     | 0.46 | WPT-4413-WPT-0638      | 48.92–56.98   | KUKRI | 1.60 | 18.74 |
| <b>Adenosine monophosphate</b>        | <i>QAmp-3B</i>     | 0.57 | WPT-1484-WPT-1191      | 107.08–108.79 | KUKRI | 1.56 | 9.92  |
|                                       | <i>QAmp-7DL</i>    |      | BARC0235-GWM0428A      | 0–18.28       | EXCAL | 1.60 | 11.00 |
| <b>Caffeoylquininate</b>              | <i>QCafquin-1B</i> | 0.71 | WPT-7833-BARC0008      | 24.58–37.8    | KUKRI | 3.39 | 9.00  |
|                                       | <i>QCafquin-1D</i> |      | WPT-7946-CFD0083B      | 46.42–79.88   | KUKRI | 5.06 | 14.32 |
|                                       | <i>QCafquin-4A</i> |      | barc0343-WPT-8886      | 102.66–120.41 | EXCAL | 4.51 | 13.21 |
|                                       | <i>QCafquin-7A</i> |      | gwm0060-wmc0283        | 80.16–81.23   | KUKRI | 4.48 | 9.70  |
| <b>Raffinose</b>                      | <i>QRaf-2B</i>     | 0.45 | WPT-8460-WPT-9736      | 148.33–151.94 | EXCAL | 1.72 | 18.81 |
| <b>1-Kestose</b>                      | <i>QKes-2B</i>     | 0.68 | wmc0476-barc1027       | 109.63–110.23 | EXCAL | 1.63 | 7.44  |
|                                       | <i>QKes-6A</i>     |      | stm0570tctga-WPT-8256  | 5.96–13.19    | KUKRI | 1.55 | 7.18  |
| <b>4-methoxy-<i>cis</i>-Cinnamate</b> | <i>Q4Mca-5B</i>    | 0.53 | WPT-6726-WPT-4936      | 78.79–89.13   | EXCAL | 5.65 | 19.97 |
| <b>Fucosterol</b>                     | <i>QFuc-3A</i>     | 0.48 | GWM0156A-stm0018tgag   | 77.2–78.3     | KUKRI | 5.88 | 27.08 |
| <b>3-amino-piperidin-2-one</b>        | <i>QAp-2A</i>      | 0.71 | WPT-7626-wmc177        | 57.16–75.63   | EXCAL | 2.85 | 12.74 |
| <b>Erythritol</b>                     | <i>QEol-1B</i>     | 0.57 | WPT-7833-BARC0008      | 24.58–37.8    | KUKRI | 3.27 | 22.61 |
| <b>Isocitrate</b>                     | <i>QlCit-4D</i>    | 0.77 | WMC0457-WPT-5809       | 5.04–6.3      | EXCAL | 1.19 | 2.82  |
|                                       | <i>QlCit-7A</i>    |      | wmc0283-BS00010307     | 81.23–102.67  | EXCAL | 6.36 | 21.45 |
| <b>Unknown 2</b>                      | <i>QU2-5B</i>      | 0.69 | BARC0088A-WPT-3200     | 67.64–69.25   | EXCAL | 2.43 | 8.49  |
|                                       | <i>QU2-7A</i>      |      | BS00009978-stm0662acag | 107.8–115.77  | KUKRI | 3.77 | 15.09 |
| <b>Unknown 3</b>                      | <i>QU3-1D</i>      | 0.54 | GWM0642-WPT-1799       | 89.54–112.74  | KUKRI | 1.40 | 6.15  |
|                                       | <i>QU3-5B</i>      |      | WPT-6726-WPT-4936      | 78.79–89.13   | KUKRI | 1.81 | 7.42  |
|                                       | <i>QU3-7A</i>      |      | wmc0283-BS00010307     | 81.23–102.67  | EXCAL | 2.31 | 11.05 |
| <b>Unknown 5</b>                      | <i>QU5-4B</i>      | 0.4  | WPT-0246-WPT-8650      | 68.72–72.63   | EXCAL | 1.09 | 5.97  |
|                                       | <i>QU5-7A</i>      |      | BS00010605-BS00009978  | 106.88–107.8  | EXCAL | 4.59 | 24.22 |
|                                       | <i>QU5-7DS</i>     |      | CFD0021B-WPT-0789      | 88.75–92.43   | EXCAL | 1.20 | 5.79  |
| <b>Unknown 9</b>                      | <i>QU9-4B</i>      | 0.52 | WMC0349A-GWM0149       | 23.73–30.78   | EXCAL | 1.50 | 16.45 |
| <b>Unknown 13</b>                     | <i>QU13-7A</i>     | 0.18 | BARC0282-wmc0017       | 130.65–132.12 | EXCAL | 2.69 | 21.82 |

|                   |                  |      |                       |               |       |       |       |
|-------------------|------------------|------|-----------------------|---------------|-------|-------|-------|
| <b>Unknown 15</b> | <i>QU15-5A</i>   | 0.49 | Vrn1A-WPT-9834        | 132.14–143.98 | EXCAL | 2.01  | 12.26 |
|                   | <i>QU15-5DL</i>  |      | WPT-5766-barc0044     | 0–11.26       | EXCAL | 2.31  | 12.43 |
| <b>Unknown 18</b> | <i>QU18-5A</i>   | 0.40 | GWM0186-WPT-8226      | 86.02–92.13   | KUKRI | 2.85  | 19.40 |
|                   | <i>QU18-7A</i>   |      | WPT-1510-WPT-8789     | 14.08–14.35   | EXCAL | 4.84  | 38.03 |
| <b>Unknown 19</b> | <i>QU19-6B</i>   | 0.75 | CFD0001B-CFD0013B     | 59.3–60.1     | EXCAL | 5.24  | 19.54 |
| <b>Unknown 21</b> | <i>QU21-6D</i>   | 0.63 | CFD0287-barc0293      | 91.22–94.12   | KUKRI | 2.59  | 9.65  |
|                   | <i>QU21-6D</i>   |      | WPT-0408- WPT-1345    | 172.1–175.38  | EXCAL | 5.68  | 23.68 |
| <b>Unknown 22</b> | <i>QU22-4B</i>   | 0.53 | WPT-7062-WPT-8756     | 33.08–62.15   | KUKRI | 3.68  | 19.59 |
|                   | <i>QU22-6D</i>   |      | CFD0019C-GWM0325      | 85.81–87.43   | EXCAL | 10.15 | 30.11 |
| <b>Unknown 24</b> | <i>QU24-3B</i>   | 0.70 | WPT-4648–WPT-5064     | 70.12–71.07   | KUKRI | 1.13  | 2.37  |
|                   | <i>QU24-7A.1</i> |      | BS00009404–WPT-1510   | 10.02–14.08   | EXCAL | 1.92  | 5.09  |
|                   | <i>QU24-7A.2</i> |      | BS00010605–BS00009978 | 106.88–107.8  | EXCAL | 3.44  | 12.42 |
|                   | <i>QU24-7A.3</i> |      | wmc0422–WPT-7299      | 134.69–138.13 | KUKRI | 1.77  | 6.96  |
|                   | <i>QU24-7A.4</i> |      | BS00003720–BS00009886 | 256.64–257.83 | KUKRI | 1.53  | 4.09  |
| <b>Unknown 25</b> | <i>QU25-7A</i>   | 0.53 | BS00010605–BS00009978 | 106.88–107.8  | EXCAL | 4.09  | 30.45 |
| <b>Unknown 27</b> | <i>QU27-5B</i>   | 0.43 | BARC0216–GWM0540      | 64.42–66.58   | EXCAL | 1.99  | 15.97 |
|                   | <i>QU27-7A</i>   |      | BS00010605–BS00009978 | 106.88–107.8  | EXCAL | 2.15  | 18.06 |
| <b>Unknown 29</b> | <i>QU29-2A</i>   | 0.47 | GWM0389–BARC1138B     | 1.72–17.04    | EXCAL | 2.63  | 31.87 |
| <b>NA5</b>        | <i>QNa5-1AS</i>  | 0.61 | WPT-8770–WPT-9317     | 12.64–13.49   | KUKRI | 1.45  | 12.23 |
|                   | <i>QNa5-5DL</i>  |      | WPT-0596–WPT-2325     | 153.7–164.4   | EXCAL | 1.14  | 8.73  |
| <b>NA6</b>        | <i>QNa6-5A</i>   | 0.52 | WPT-0373–wmc0075b     | 126.71–130.48 | KUKRI | 2.74  | 7.61  |
|                   | <i>QNa6-7A</i>   |      | wmc0283–BS00010307    | 81.23–102.67  | EXCAL | 6.06  | 20.35 |
| <b>NA7</b>        | <i>QNa7-2A</i>   | 0.63 | GWM0312–stm0761tcac   | 112.98–117.9  | EXCAL | 1.40  | 3.91  |
|                   | <i>QNa7-3D</i>   |      | BARC0042–CFD0223A     | 6.24–25.99    | KUKRI | 0.82  | 2.60  |
|                   | <i>QNa7-6B</i>   |      | WPT-7662–WPT-2964     | 0–3.32        | KUKRI | 3.46  | 11.52 |
|                   | <i>QNa7-7A</i>   |      | wmc0017–wmc0422       | 132.12–134.69 | EXCAL | 1.59  | 5.56  |
|                   | <i>QNa7-7DL</i>  |      | WPT-5674–CFD0083A     | 24.51–31.51   | KUKRI | 1.22  | 3.56  |
| <b>NA10</b>       | <i>QNa10-7A</i>  | 0.45 | wmc0283–BS00010307    | 81.23–102.67  | EXCAL | 4.26  | 33.51 |
| <b>NA11</b>       | <i>QNa11-7A</i>  | 0.57 | wmc0283–BS00010307    | 81.23–102.67  | EXCAL | 5.82  | 20.67 |
| <b>NA13</b>       | <i>QNa13-3A</i>  | 0.66 | WPT-4407–GWM0156A     | 46.74–77.2    | EXCAL | 1.53  | 4.77  |

|             |                   |      |                       |               |       |      |       |
|-------------|-------------------|------|-----------------------|---------------|-------|------|-------|
|             | <i>QNa13-4A</i>   |      | wmc0603–WPT-2542      | 87.57–89.25   | EXCAL | 2.15 | 5.13  |
|             | <i>QNa13-4B</i>   |      | WPT-7062–WPT-8756     | 33.08–62.15   | KUKRI | 2.00 | 8.26  |
|             | <i>QNa13-5A</i>   |      | GWM0186–WPT-8226      | 86.02–92.13   | KUKRI | 1.76 | 4.41  |
|             | <i>QNa13-7A</i>   |      | WMC0083–STM0511TCTG   | 119.44–121.07 | KUKRI | 2.54 | 6.89  |
|             | <i>QNa13-7DL</i>  |      | WPT-5674–CFD0083A     | 24.51–31.51   | EXCAL | 0.83 | 1.91  |
| <b>NA15</b> | <i>QNa15-1B</i>   | 0.46 | WPT-7833–BARC0008     | 24.58–37.8    | EXCAL | 2.02 | 18.29 |
| <b>NA16</b> | <i>QNa16-1AL</i>  | 0.67 | WPT-6005–WPT-2855     | 19.58–25.66   | EXCAL | 1.00 | 3.60  |
|             | <i>QNa16-2A</i>   |      | BARC1138B–wmc667      | 17.04–20.34   | KUKRI | 2.81 | 8.82  |
|             | <i>QNa16-5A</i>   |      | Vrn1A–WPT-9834        | 132.14–143.98 | KUKRI | 1.87 | 6.50  |
|             | <i>QNa16-7DS</i>  |      | WPT-0366–WPT-5049     | 0–1.14        | KUKRI | 2.72 | 8.56  |
| <b>NA17</b> | <i>QNa17-4A</i>   | 0.5  | WPT-2951–GWM0471C     | 153.68–164.26 | KUKRI | 2.14 | 19.38 |
| <b>NA18</b> | <i>QNa18-4A</i>   | 0.55 | stm0092tctg–GWM0428B  | 0–11.9        | KUKRI | 3.02 | 17.91 |
|             | <i>QNa18-7A</i>   |      | CFA2049–gwm0060       | 78.48–80.16   | EXCAL | 3.62 | 21.42 |
| <b>NA19</b> | <i>QNa19-4A.1</i> | 0.61 | stm0506tgag–WPT-2788  | 14.76–42.83   | KUKRI | 3.39 | 14.09 |
|             | <i>QNa19-4A.2</i> |      | WPT-2951–GWM0471C     | 153.68–164.26 | KUKRI | 2.67 | 9.92  |
|             | <i>QNa19-7A</i>   |      | wmc0283–BS00010307    | 81.23–102.67  | EXCAL | 5.87 | 25.95 |
| <b>NA20</b> | <i>QNa20-4A</i>   | 0.62 | WPT-2951–GWM0471C     | 153.68–164.26 | KUKRI | 2.25 | 9.60  |
|             | <i>QNa20-5B</i>   |      | WPT-1457–barc0112     | 70.32–75.02   | KUKRI | 2.74 | 11.23 |
|             | <i>QNa20-7A</i>   |      | BS00010605–BS00009978 | 106.88–107.8  | EXCAL | 6.31 | 26.17 |
| <b>NA21</b> | <i>QNa21-5B</i>   | 0.61 | WPT-1457–barc0112     | 70.32–75.02   | KUKRI | 2.90 | 13.88 |
|             | <i>QNa21-7A</i>   |      | BS00010605–BS00009978 | 106.88–107.8  | EXCAL | 6.44 | 31.23 |
| <b>NA23</b> | <i>QNa23-1AS</i>  | 0.65 | CFD0059–WPT-6654      | 63.29–65.06   | KUKRI | 2.13 | 8.67  |
|             | <i>QNa23-4B</i>   |      | WPT-8756–WPT-1272     | 62.15–68.1    | EXCAL | 4.00 | 17.58 |
| <b>NA26</b> | <i>QNa26-4B</i>   | 0.39 | WPT-0246–WPT-8650     | 68.72–72.63   | EXCAL | 1.43 | 6.58  |
|             | <i>QNa26-5A</i>   |      | WPT-0373–wmc0075b     | 126.71–130.48 | KUKRI | 1.76 | 7.21  |
|             | <i>QNa26-7A</i>   |      | BS00010605–BS00009978 | 106.88–107.8  | EXCAL | 4.08 | 17.71 |
| <b>NA27</b> | <i>QNa27-5B</i>   | 0.49 | WPT-9666–WPT-5914     | 51.97–59.54   | EXCAL | 6.64 | 15.39 |
| <b>NA28</b> | <i>QNa28-4B</i>   | 0.62 | WPT-0037–WPT-3608     | 0–14.18       | KUKRI | 1.97 | 8.71  |
|             | <i>QNa28-4D</i>   |      | WMC0457–WPT-5809      | 5.04–6.3      | KUKRI | 1.04 | 3.14  |
|             | <i>QNa28-5A</i>   |      | WPT-8226–WPT-0373     | 92.13–126.71  | KUKRI | 2.04 | 8.57  |

|             |                    |      |                       |               |       |       |       |
|-------------|--------------------|------|-----------------------|---------------|-------|-------|-------|
| <b>NA30</b> | <i>QNa30-2A.1</i>  | 0.62 | WPT-7626-wmc177       | 57.16–75.63   | EXCAL | 1.08  | 4.85  |
|             | <i>QNa30-2A.2</i>  |      | WPT-9793–WPT-6687     | 169.65–170.79 | KUKRI | 0.98  | 3.39  |
|             | <i>QNa30-4D</i>    |      | WMC0457–WPT-5809      | 5.04–6.3      | EXCAL | 3.51  | 12.92 |
|             | <i>QNa30-7A</i>    |      | BS00010605–BS00009978 | 106.88–107.8  | EXCAL | 3.01  | 13.25 |
| <b>NA33</b> | <i>QNa33-6A</i>    | 0.46 | CFD0001C–WPT-9690     | 27.18–27.9    | KUKRI | 6.18  | 52.74 |
| <b>NA41</b> | <i>QNa41-1B</i>    | 0.54 | WPT-1684–WPT-1374     | 40.86–50.6    | EXCAL | 7.08  | 25.70 |
| <b>NA42</b> | <i>QNa42-3A</i>    | 0.47 | WPT-9215–WPT-3816     | 80.05–109.35  | EXCAL | 2.49  | 18.19 |
| <b>NA43</b> | <i>QNa43-5A</i>    | 0.43 | WPT-8226–WPT-0373     | 92.13–126.71  | KUKRI | 1.61  | 16.30 |
| <b>NA44</b> | <i>QNa44-3A</i>    | 0.52 | CFA2193B–CFA2170      | 115.25–139    | EXCAL | 1.87  | 15.35 |
|             | <i>QNa44-7A</i>    |      | CFA2049–gwm0060       | 78.48–80.16   | EXCAL | 1.26  | 8.98  |
| <b>NA45</b> | <i>QNa45-2B</i>    | 0.28 | WPT-3561–WPT-7757     | 79.27–83.54   | EXCAL | 3.69  | 18.45 |
|             | <i>QNa45-4B</i>    |      | WPT-7062–WPT-8756     | 33.08–62.15   | KUKRI | 2.36  | 19.92 |
| <b>NA47</b> | <i>QNa47-1D</i>    | 0.48 | WPT-4971–WPT-9181     | 0–11.53       | KUKRI | 2.32  | 14.53 |
| <b>NA50</b> | <i>QNa50-7A</i>    | 0.82 | WPT-8789–WPT-0744     | 14.35–14.81   | EXCAL | 45.78 | 59.57 |
| <b>NA52</b> | <i>QNa52-7A</i>    | 0.80 | WPT-8789–WPT-0744     | 14.35–14.81   | EXCAL | 45.90 | 61.71 |
| <b>NA53</b> | <i>QNa53-3A</i>    | 0.49 | GWM0156A–stm0018tgag  | 77.2–78.3     | KUKRI | 8.80  | 28.26 |
|             | <i>QNa53-3B</i>    |      | BARC0131–WPT-1484     | 77.66–107.08  | KUKRI | 4.12  | 19.05 |
|             | <i>QNa53-7DS</i>   |      | stm0789tcacA–GWM0437  | 99.45–112.57  | EXCAL | 2.05  | 7.21  |
| <b>NA54</b> | <i>QNa54-7A</i>    | 0.49 | BS00010605–BS00009978 | 106.88–107.8  | EXCAL | 9.62  | 48.71 |
| <b>NA55</b> | <i>QNa55-1AS.1</i> | 0.49 | PSP2999–WPT-2527      | 11.13–11.72   | KUKRI | 3.64  | 25.71 |
|             | <i>QNa55-1AS.2</i> |      | BARC0263B–CFD0021A    | 18.18–18.73   | EXCAL | 2.46  | 17.01 |
|             | <i>QNa55-2A</i>    |      | WPT-9793–WPT-6687     | 169.65–170.79 | KUKRI | 1.44  | 1.02  |
|             | <i>QNa55-4B</i>    |      | WPT-7062–WPT-8756     | 33.08–62.15   | EXCAL | 4.04  | 5.64  |
|             | <i>QNa55-5A</i>    |      | WPT-0373–wmc0075b     | 126.71–130.48 | KUKRI | 2.00  | 1.65  |
|             | <i>QNa55-7A</i>    |      | BS00010605–BS00009978 | 106.88–107.8  | EXCAL | 4.14  | 3.83  |
| <b>NA56</b> | <i>QNa56-7A</i>    | 0.55 | BS00010605–BS00009978 | 106.88–107.8  | EXCAL | 5.58  | 33.94 |
| <b>NA57</b> | <i>QNa57-1B</i>    | 0.41 | WPT-1374–BARC0137     | 50.6–51.77    | EXCAL | 2.54  | 12.89 |
|             | <i>QNa57-2B.1</i>  |      | WPT-1663–WPT-0643     | 0–5.25        | KUKRI | 1.58  | 7.20  |
|             | <i>QNa57-2B.2</i>  |      | BARC0160–GWM0388      | 116.69–126.03 | KUKRI | 2.45  | 14.78 |
|             | <i>QNa57-7A</i>    |      | wmc0283–BS00010307    | 81.23–102.67  | KUKRI | 2.86  | 17.70 |

|             |                   |      |                       |               |       |      |       |
|-------------|-------------------|------|-----------------------|---------------|-------|------|-------|
| <b>NA58</b> | <i>QNa58-3B</i>   | 0.52 | BARC0164–GWM0383      | 146.46–158.53 | KUKRI | 4.26 | 11.87 |
|             | <i>QNa58-4B</i>   |      | WMC0349A–GWM0149      | 23.73–30.78   | KUKRI | 1.31 | 4.61  |
|             | <i>QNa58-5A</i>   |      | WPT-8226–WPT-0373     | 92.13–126.71  | KUKRI | 2.62 | 9.49  |
|             | <i>QNa58-7A.1</i> |      | WPT-8789–WPT-0744     | 14.35–14.81   | KUKRI | 4.82 | 12.43 |
|             | <i>QNa58-7A.2</i> |      | BS00010605–BS00009978 | 106.88–107.8  | EXCAL | 6.90 | 18.81 |
| <b>NA59</b> | <i>QNa59-1B</i>   | 0.57 | WPT-8279–WPT-0705     | 60.91–62.89   | EXCAL | 2.68 | 7.42  |
|             | <i>QNa59-5A</i>   |      | WPT-8226–WPT-0373     | 92.13–126.71  | KUKRI | 5.90 | 22.14 |
|             | <i>QNa59-7A</i>   |      | BS00010605–BS00009978 | 106.88–107.8  | EXCAL | 7.17 | 21.28 |
| <b>NA60</b> | <i>QNa60-5A</i>   | 0.51 | WPT-0373–wmc0075b     | 126.71–130.48 | KUKRI | 3.81 | 15.86 |
|             | <i>QNa60-6D</i>   |      | CFD0287–barc0293      | 91.22–94.12   | KUKRI | 4.01 | 15.86 |
|             | <i>QNa60-7A</i>   |      | WMC0083–STM0511TCTG   | 119.44–121.07 | EXCAL | 2.88 | 13.79 |

Supplemental Table 4: Chromosome position, marker interval, LOD values and trait heritabilities for agronomic trait QTL

| TRAIT NAME                     | QTL NAME          | H <sup>2</sup> | INTERVAL             | POSITION (cM) | ALLELE | LOD   | GENETIC VARIANCE |
|--------------------------------|-------------------|----------------|----------------------|---------------|--------|-------|------------------|
| <b>Thermal time to heading</b> | <i>QTth-2B</i>    | 0.97           | WPT-6199–WPT-0709    | 84.82–101.78  | KUKRI  | 4.79  | 5.70             |
|                                | <i>QTth-5A</i>    |                | wmc0075b–Vrn1A       | 130.48–132.14 | EXCAL  | 12.15 | 10.20            |
|                                | <i>QTth-7A</i>    |                | wmc0283–BS00010307   | 81.23–102.67  | KUKRI  | 33.99 | 39.03            |
| <b>Glaucousness</b>            | <i>QGla-2A.1</i>  | 0.83           | GWM0389–BARC1138B    | 1.72–17.04    | KUKRI  | 1.36  | 4.08             |
|                                | <i>QGla-2A.2</i>  |                | wmc177–wmc598        | 75.63–76.22   | EXCAL  | 1.81  | 4.48             |
|                                | <i>QGla-2B</i>    |                | WPT-3459–WPT-2106    | 5.88–8.81     | KUKRI  | 4.51  | 11.56            |
|                                | <i>QGla-7A</i>    |                | gwm0060–wmc0283      | 80.16–81.23   | KUKRI  | 4.73  | 13.12            |
| <b>Leaf rolling 1</b>          | <i>QLfr1-1AS</i>  | 0.79           | WPT-2872–barc0350    | 48.98–60.29   | EXCAL  | 2.89  | 6.00             |
|                                | <i>QLfr1-5A</i>   |                | WPT-0373–wmc0075b    | 126.71–130.48 | EXCAL  | 4.64  | 8.13             |
|                                | <i>QLfr1-5B</i>   |                | GWM0540–BARC0088A    | 66.58–67.64   | KUKRI  | 2.26  | 4.06             |
|                                | <i>QLfr1-7A</i>   |                | wmc0283–BS00010307   | 81.23–102.67  | KUKRI  | 6.14  | 13.95            |
|                                | <i>QLfr1-7DL</i>  |                | WPT-5674–CFD0083A    | 24.51–31.51   | KUKRI  | 0.92  | 1.58             |
| <b>Leaf rolling 2</b>          | <i>QLfr2-1AL</i>  | 0.85           | WPT-6005–WPT-2855    | 19.58–25.66   | KUKRI  | 1.21  | 2.28             |
|                                | <i>QLfr2-4B</i>   |                | WPT-7062–WPT-8756    | 33.08–62.15   | KUKRI  | 2.48  | 7.51             |
|                                | <i>QLfr2-5A</i>   |                | wmc0075b–Vrn1A       | 130.48–132.14 | EXCAL  | 3.18  | 5.39             |
|                                | <i>QLfr2-7A</i>   |                | wmc0283–BS00010307   | 81.23–102.67  | KUKRI  | 6.55  | 15.97            |
| <b>Chlorophyll 1 SPAD</b>      | <i>QSpad1-2B</i>  | 0.59           | BARC0160–GWM0388     | 116.69–126.03 | EXCAL  | 2.06  | 12.66            |
|                                | <i>QSpad1-6B</i>  |                | WPT-2587–WPT-4764    | 75.45–81.5    | KUKRI  | 2.00  | 9.98             |
| <b>Chlorophyll 2 SPAD</b>      | <i>QSpad2-1AL</i> | 0.63           | WPT-0128–WPT-1011    | 0–13.97       | KUKRI  | 0.61  | 1.96             |
|                                | <i>QSpad2-1B</i>  |                | WPT-3753–WPT-7129    | 19.85–20.85   | KUKRI  | 1.32  | 4.12             |
|                                | <i>QSpad2-2B</i>  |                | WPT-6199–WPT-0709    | 84.82–101.78  | EXCAL  | 3.57  | 15.80            |
|                                | <i>QSpad2-3A</i>  |                | stm0018tgag–WPT-9215 | 78.3–80.05    | KUKRI  | 2.20  | 5.89             |
| <b>Crown rot 1</b>             | <i>QCR-1AL</i>    | 0.74           | WPT-6005–WPT-2855    | 19.58–25.66   | EXCAL  | 0.77  | 1.11             |
|                                | <i>QCR-2A</i>     |                | stm0761tcac–gdm0093  | 117.9–164.74  | KUKRI  | 2.23  | 4.83             |
|                                | <i>QCR-2B</i>     |                | WPT-3459–WPT-2106    | 5.88–8.81     | KUKRI  | 9.98  | 14.08            |
|                                | <i>QCR-2D</i>     |                | WPT-2644–WPT-4413    | 30.23–48.92   | EXCAL  | 1.71  | 2.89             |
|                                | <i>QCR-3B</i>     |                | BARC0077–WPT-0021    | 215.74–219.61 | KUKRI  | 1.59  | 2.15             |

|                           |                   |      |                       |               |       |       |       |
|---------------------------|-------------------|------|-----------------------|---------------|-------|-------|-------|
|                           | <i>QCR-5B</i>     |      | WPT-3200–WPT-1457     | 69.25–70.32   | EXCAL | 6.05  | 7.64  |
|                           | <i>QCR-6A</i>     |      | stm0570tctga–WPT-8256 | 5.96–13.19    | EXCAL | 1.53  | 2.15  |
|                           | <i>QCR-6B</i>     |      | WPT-6653–WPT-4930     | 31.01–32.28   | EXCAL | 4.12  | 5.70  |
|                           | <i>QCR-7A.1</i>   |      | gwm0060–wmc0283       | 80.16–81.23   | KUKRI | 5.43  | 7.34  |
|                           | <i>QCR-7A.2</i>   |      | gdm0125–WPT-0790      | 246.89–248.7  | EXCAL | 2.79  | 3.82  |
| <b>Days to senescence</b> | <i>QDs-2B</i>     | 0.93 | WPT-6199–WPT-0709     | 84.82–101.78  | KUKRI | 4.59  | 8.50  |
|                           | <i>QDs-4A</i>     |      | WMC0258–wmc0603       | 75.22–87.57   | EXCAL | 2.92  | 3.85  |
|                           | <i>QDs-7A</i>     |      | wmc0283–BS00010307    | 81.23–102.67  | KUKRI | 24.13 | 40.51 |
| <b>Flag leaf length</b>   | <i>QFlth-4B</i>   | 0.76 | WPT-7062–WPT-8756     | 33.08–62.15   | EXCAL | 1.74  | 6.10  |
|                           | <i>QFlth-5A</i>   |      | wmc0075b–Vrn1A        | 130.48–132.14 | KUKRI | 7.83  | 15.41 |
|                           | <i>QFlth-5B</i>   |      | WPT-9666–WPT-5914     | 51.97–59.54   | EXCAL | 1.4   | 3.30  |
|                           | <i>QFlth-7A</i>   |      | wmc0283–BS00010307    | 81.23–102.67  | EXCAL | 5.14  | 14.39 |
| <b>Head length</b>        | <i>QHlth-2B</i>   | 0.86 | gwm0120–WPT-2430      | 134.18–136.07 | KUKRI | 1.71  | 3.74  |
|                           | <i>QHlth-2D</i>   |      | WPT-8524–WPT-1991     | 101.03–104.7  | EXCAL | 1.86  | 3.65  |
|                           | <i>QHlth-4A</i>   |      | wmc0603–WPT-2542      | 87.57–89.25   | EXCAL | 6.94  | 13.24 |
|                           | <i>QHlth-6A</i>   |      | WPT-9132–CFD0001C     | 24.78–27.18   | KUKRI | 3.03  | 6.12  |
|                           | <i>QHlth-6D</i>   |      | CFD0019C–GWM0325      | 85.81–87.43   | KUKRI | 2.95  | 5.62  |
| <b>Peduncle length</b>    | <i>QPlth-2B</i>   | 0.89 | wmc0476–barc1027      | 109.63–110.23 | EXCAL | 2.68  | 4.11  |
|                           | <i>QPlth-2D</i>   |      | WPT-8319–WPT-3757     | 95.27–96.11   | KUKRI | 1.45  | 1.87  |
|                           | <i>QPlth-3A</i>   |      | WPT-4407–GWM0156A     | 46.74–77.2    | KUKRI | 3.67  | 6.20  |
|                           | <i>QPlth-4A.1</i> |      | WPT-7001–stm0506tgag  | 13.14–14.76   | KUKRI | 1.36  | 1.72  |
|                           | <i>QPlth-4A.2</i> |      | WPT-2794–WPT-0610     | 132.71–138.75 | KUKRI | 3.02  | 5.16  |
|                           | <i>QPlth-5A</i>   |      | Vrn1A–WPT-9834        | 132.14–143.98 | KUKRI | 13.04 | 18.61 |
|                           | <i>QPlth-6D.1</i> |      | WPT-1695–stm0570tctgb | 5.49–7.78     | EXCAL | 1.51  | 1.71  |
|                           | <i>QPlth-6D.1</i> |      | GWM0325–CFD0287       | 87.43–91.22   | KUKRI | 0.89  | 1.14  |
|                           | <i>QPlth-7A</i>   |      | gwm0060–wmc0283       | 80.16–81.23   | EXCAL | 12.81 | 17.65 |
| <b>Plant height</b>       | <i>QHt-2D</i>     | 0.82 | WPT-3728–WPT-8319     | 57.56–95.27   | KUKRI | 1.57  | 4.70  |
|                           | <i>QHt-4A</i>     |      | WPT-2983–WPT-6440     | 124.48–126.53 | KUKRI | 1.93  | 4.36  |
|                           | <i>QHt-6B</i>     |      | CFD0013B–BARC0045     | 60.1–61.42    | EXCAL | 3.43  | 7.50  |
|                           | <i>QHt-6D</i>     |      | CFD0287–barc0293      | 91.22–94.12   | KUKRI | 3.08  | 6.01  |



|                                          |                  |      |                      |               |       |       |       |
|------------------------------------------|------------------|------|----------------------|---------------|-------|-------|-------|
| <b>Thousand grain weight of 5 plants</b> | <i>QTgw5p-2A</i> | 0.78 | stm0761tcac-gdm0093  | 117.9–164.74  | KUKRI | 2.92  | 7.90  |
|                                          | <i>QTgw5p-4A</i> |      | WMC0258-wmc0603      | 75.22–87.57   | KUKRI | 4.61  | 8.93  |
|                                          | <i>QTgw5p-7A</i> |      | wmc0283-BS00010307   | 81.23–102.67  | EXCAL | 12.73 | 30.77 |
| <b>Grain yield (kg/ha)</b>               | <i>QYld-1B</i>   | 0.92 | WPT-3475-stm0658acag | 117.24–135.46 | EXCAL | 1.31  | 2.61  |
|                                          | <i>QYld-2B.1</i> |      | WPT-1663-WPT-0643    | 0–5.25        | EXCAL | 3.87  | 6.37  |
|                                          | <i>QYld-2B.2</i> |      | WPT-0709-BARC0091    | 101.78–103.62 | EXCAL | 4.55  | 9.76  |
|                                          | <i>QYld-4A</i>   |      | WPT-2794-WPT-0610    | 132.71–138.75 | KUKRI | 1.74  | 3.70  |
|                                          | <i>QYld-5B</i>   |      | WPT-9666-WPT-5914    | 51.97–59.54   | KUKRI | 6.10  | 11.79 |
|                                          | <i>QYld-7A.1</i> |      | gwm0060-wmc0283      | 80.16–81.23   | EXCAL | 5.06  | 11.90 |
|                                          | <i>QYld-7A.2</i> |      | WMC0083-STM0511TCTG  | 119.44–121.07 | EXCAL | 2.21  | 5.80  |
| <b>Thousand grain weight</b>             | <i>QTgw-2B</i>   | 0.86 | WPT-2106-GWM0257     | 8.81–71.86    | EXCAL | 2.87  | 8.52  |
|                                          | <i>QTgw-7A</i>   |      | wmc0283-BS00010307   | 81.23–102.67  | EXCAL | 12.88 | 24.79 |
| <b>Spikes/m<sup>2</sup></b>              | <i>QSpm2-2A</i>  | 0.77 | stm0761tcac-gdm0093  | 117.9–164.74  | KUKRI | 2.89  | 7.99  |
|                                          | <i>QSpm2-4A</i>  |      | WMC0258-wmc0603      | 75.22–87.57   | KUKRI | 4.59  | 9.04  |
|                                          | <i>QSpm2-7A</i>  |      | wmc0283-BS00010307   | 81.23–102.67  | EXCAL | 12.66 | 31.19 |
| <b>Grains/m<sup>2</sup></b>              | <i>QGm2-2B</i>   | 0.84 | WPT-2106-GWM0257     | 8.81–71.86    | EXCAL | 2.30  | 10.07 |
|                                          | <i>QGm2-4A</i>   |      | WPT-2983-WPT-6440    | 124.48–126.53 | KUKRI | 1.56  | 4.09  |
|                                          | <i>QGm2-5B</i>   |      | WPT-9666-WPT-5914    | 51.97–59.54   | KUKRI | 5.26  | 13.12 |
|                                          | <i>QGm2-6D</i>   |      | CFD0019C-GWM0325     | 85.81–87.43   | EXCAL | 2.16  | 4.43  |
|                                          | <i>QGm2-7A</i>   |      | gwm0060-wmc0283      | 80.16–81.23   | EXCAL | 2.78  | 6.29  |
| <b>G2.5</b>                              | <i>QG25-2B</i>   | 0.94 | WPT-2106-GWM0257     | 8.81–71.86    | EXCAL | 3.47  | 6.88  |
|                                          | <i>QG25-4A</i>   |      | WMC0258-wmc0603      | 75.22–87.57   | KUKRI | 5.09  | 5.65  |
|                                          | <i>QG25-7A</i>   |      | wmc0283-BS00010307   | 81.23–102.67  | EXCAL | 23.87 | 29.90 |
| <b>G2.2</b>                              | <i>QG22-7A</i>   | 0.89 | wmc0283-BS00010307   | 81.23–102.67  | KUKRI | 8.29  | 26.04 |
| <b>L2.2</b>                              | <i>QL22-2B</i>   | 0.95 | WPT-2106-GWM0257     | 8.81–71.86    | KUKRI | 2.32  | 7.29  |
|                                          | <i>QL22-7A</i>   |      | wmc0283-BS00010307   | 81.23–102.67  | KUKRI | 15.05 | 32.32 |
| <b>Test weight</b>                       | <i>QHlwt-1B</i>  | 0.89 | WPT-9809-WPT-2526    | 103.86–114.93 | EXCAL | 2.38  | 4.56  |
|                                          | <i>QHlwt-2A</i>  |      | gdm0093-WPT-9793     | 164.74–169.65 | KUKRI | 3.16  | 4.93  |
|                                          | <i>QHlwt-2D</i>  |      | WPT-8524-WPT-1991    | 101.03–104.7  | EXCAL | 2.24  | 3.83  |
|                                          | <i>QHlwt-7A</i>  |      | wmc0283-BS00010307   | 81.23–102.67  | EXCAL | 12.78 | 30.05 |

---

|                |                 |      |                       |               |       |       |       |
|----------------|-----------------|------|-----------------------|---------------|-------|-------|-------|
| <b>Harvest</b> | <i>QHi-2B.1</i> | 0.71 | WPT-0709–BARC0091     | 101.78–103.62 | EXCAL | 4.96  | 11.57 |
| <b>index</b>   | <i>QHi-2B.2</i> |      | WPT-8460–WPT-9736     | 148.33–151.94 | KUKRI | 2.46  | 5.38  |
|                | <i>QHi-4A</i>   |      | WPT-2794–WPT-0610     | 132.71–138.75 | KUKRI | 1.43  | 2.59  |
|                | <i>QHi-5B</i>   |      | WPT-8604–WPT-9666     | 51.36–51.97   | KUKRI | 1.97  | 2.82  |
|                | <i>QHi-6D</i>   |      | stm0570tctgb–CFD0019C | 7.78–85.81    | EXCAL | 1.19  | 3.66  |
|                | <i>QHi-7A</i>   |      | gwm0060–wmc0283       | 80.16–81.23   | EXCAL | 17.09 | 24.21 |

---
